# A comparison of cardiovascular risk factors among Asian migrants and the native population in Korea

Heng Piao<sup>1,2</sup>, Jae Moon Yun<sup>1</sup>, Aesun Shin<sup>3,4</sup>, Daehee Kang<sup>2,3,4</sup>, Belong Cho<sup>1,5\*</sup>

<sup>1</sup>*Department of Family Medicine, Seoul National University Hospital, Seoul National University College of Medicine, Seoul 03080, Republic of Korea*

<sup>2</sup>*Department of Cancer Epidemiology and Prevention, Henan Cancer Hospital, Affiliate Cancer Hospital of Zhengzhou University, Zhengzhou 450003, China*

<sup>3</sup>*Department of Preventive Medicine, Seoul National University College of Medicine, Seoul 03080, Republic of Korea*

<sup>4</sup>*Department of Innovative Medical Sciences, Seoul National University Graduate School, Seoul 03080, Republic of Korea*

<sup>5</sup>*Health Promotion Center, Seoul National University Hospital, Seoul 03080, Republic of Korea*

**\*Corresponding Author:**

E-mail: [belong@snu.ac.kr](mailto:belong@snu.ac.kr)

Tel: 82-2-2072-2195, 82-10-9865-2195

Fax: 82-2-766-3276

## ABSTRACT

**OBJECTIVES** To investigate cardiovascular risk factors among Asian migrants in Korea, compared to Koreans and the general population in the home countries, according to nationality.

**DESIGN** Longitudinal ecological study

**SETTING** 282 local authorities in Korea, classified by city, province and district, 2009-2015.

**PARTICIPANTS** 987,214 Asian migrants and 1,693,281 Koreans aged 20 years and older.

**MAIN OUTCOME MEASURES** First, the prevalence of current smokers, physical inactivity, obesity, diabetes, hypertension, and hypercholesterolemia; second, incident type 2 diabetes and hypertension.

**RESULTS** Among participants who were 20 years and older, the age-adjusted prevalence of obesity in Chinese migrant women (25.6%) was higher than that in Korean women (23.2%) ( $P < 0.0001$ ). The age-adjusted prevalence of obesity in Filipino migrant women (30.9%) was higher than that in Korean women (23.2%) ( $P = 0.0023$ ). The age-adjusted prevalence of obesity in other Asian migrant women (35.5%) was higher than that in Korean women (23.2%) ( $P < 0.0001$ ). In addition, among participants aged 20–49 years, the age-adjusted prevalence of diabetes in Filipino migrant women (2.6%) was higher than that in Korean women (1.8%) ( $P = 0.0090$ ). The age-adjusted prevalence of hypertension in Filipino migrant women (7.7%) was higher than that in Korean women (4.2%) ( $P < 0.0001$ ). In the multivariate analyses, compared to Koreans, the odds ratios of developing type 2 diabetes and hypertension were 0.82 (95% CI, 0.78 to 0.86) and 0.77 (95% CI, 0.75 to 0.79) among Asian migrants, respectively. However, the odds ratio of developing type 2 diabetes was 1.32 (95% CI, 1.11 to 1.57) among Vietnamese migrant men aged 20–39 years compared to Korean men. Compared to Korean women, the odds ratios of developing hypertension were 1.49 (95% CI, 1.05 to 2.11) and 2.22 (95% CI, 1.17 to 4.19) among Filipino

migrant women aged 20–39 years and more than 40 years, respectively. Moreover, the age-adjusted prevalence of obesity (41.4%) in Filipino migrant men was higher than that (30.4%) in men from the general population in the Philippines in 2015. Furthermore, in 2014, the age-adjusted prevalence of diabetes (12.5%) among Filipino migrant men was higher than that (7.1%) in men from the general population in the Philippines.

**CONCLUSIONS** Although most Asian migrants were less likely to have type 2 diabetes and hypertension than Koreans, primary and secondary prevention of type 2 diabetes and hypertension among the majority of Asian migrants in Korea, especially targeting the specific age and sex groups according to nationality, is required. In addition, the problem of obesity among Asian migrants in Korea, especially in Asian migrant women, should be addressed.

#### **WHAT IS ALREADY KNOWN ON THIS TOPIC**

According to the healthy migrant hypothesis, international migrants, particularly recent migrants, are healthier than the general population of the host country.

This health advantage among international migrants, also known as the healthy migrant effect, gradually disappears with increasing duration of residence in the host country.

However, whether the health advantage exists with regard to cardiovascular risk factors among Asian migrants in Korea is unclear.

#### **WHAT THIS STUDY ADDS**

The association between Asian migrants and cardiovascular risk factors according to nationality can provide basic evidence for targeting high-risk groups and improving policy development in Korea.

In the multivariate analyses, among participants aged 20–39 years, Vietnamese migrant men were more likely to have T2D than Korean men; and among participants aged 20 years and older, Filipino migrant women were more likely to have hypertension than Korean women after adjusting for covariates.

In 2015, among participants who were 20 years and older, the age-adjusted prevalence of obesity in Chinese, Filipino, and other Asian migrant women were higher than that in Korean women, respectively.

## Introduction

Recent systematic reviews and meta-analyses of migrant health have supported the healthy migration hypothesis, which describes health advantages among international migrants (1, 2). This health advantage, also known as the healthy migration effect, suggests that international migrants, especially new migrants, are healthier than the overall population of the host country (2-4). The healthy migration effect can be attributed to self-selection or immigration policies (3-6). However, the healthy migrant effect will gradually disappear as the duration of residence in the host country increases (2, 7, 8).

Targeting international migrants in Europe, North America, and Australia, cardiovascular disease varies with country of origin and destination and the length of stay in the host country (9). In addition, length of stay in the United States is associated with an increased prevalence of cardiovascular risk factors, such as obesity, diabetes, and hypertension among international migrants (10). However, it is unclear whether a health advantage of cardiovascular risk factors exists among Asian migrants in Korea. Moreover, it is not clear how the development of type 2 diabetes (T2D) and hypertension are changing according to nationality.

First, this study aimed to investigate the differences in the prevalence of cardiovascular risk factors between Asian migrants of different nationalities and Korean and to confirm whether there is a healthy migration effect in Korea. Second, we aimed to examine the differences in the development of T2D and hypertension between Asian migrants and Koreans, using the nationwide population. Finally, we aimed to examine the differences in obesity, diabetes, and elevated blood pressure among Chinese, Filipino, and Vietnamese migrants compared with the general population of their home country.

## Methods

### Study population

We conducted a population-based analysis of Asian migrants and the general population aged  $\geq 20$  years who underwent health check-ups during 2009–2015 using the National Health Information Database (NHID) established by the Korean National Health Insurance Service (NHIS) (11, 12). The NHID included the eligibility, National Health check-up, healthcare utilisation, long-term care insurance, and health care provider information (12). In addition, the NHID is suitable for population-based studies aimed at primary and secondary prevention of chronic diseases such as diabetes and hypertension (12-15). The database of health check-up for Asian migrants was available from customized NHID data, which represent the majority of Asian migrants who underwent health check-ups in Korea (11, 12). Moreover, the health check-up database of the Korean population was obtained from the 1 million sample cohort of the NHID, which was a random sample 2.2% of the Korean-born population, representing the nationwide population in Korea (11, 16). Of 2,691,010 participants aged  $\geq 20$  years who underwent health check-ups during 2009–2015, we excluded 350 without information on blood pressure, fasting blood glucose, and total cholesterol. Furthermore, 10,165 with missing information on smoking status, alcohol use and physical activity were excluded. Finally, the study population of 2,680,495 participants included 987,214 Asian migrants and 1,693,281 Koreans (11). From 2009 to 2015, the number of Asian migrants by year was 93,845, 113,414, 129,827, 132,226, 142,275, 175,082, and 200,545, respectively; the number of Koreans by year was 208,772, 231,881, 236,751, 244,443, 243,592, 261,680, and 266,162, respectively (11). After excluding participants with diabetes and hypertension at the first health check-up (2009-2015), the number of participants who underwent health check-ups more than once with information on the presence or absence of diabetes and hypertension at the last health check-up was 505,342 and

431,433, respectively. The number of participants newly diagnosed with T2D and hypertension between the first and last health check-up was 22,284 and 48,007, respectively (17).

In the current study, Asian migrants were from China, Japan, Vietnam, the Philippines, Indonesia, Thailand, Uzbekistan, Sri Lanka, Mongolia, Bangladesh, Pakistan, and India. Asian migrants were divided into Chinese, Japanese, Filipino, Vietnamese, and other Asian migrants to ensure sufficient samples after age standardisation in 2015. In addition, for the accuracy of age standardisation, migrants from Thailand, Uzbekistan, Sri Lanka, Mongolia, Bangladesh, Pakistan, Indonesia, and India were grouped into ‘other Asian migrants’ when the data were derived from the NHIS. For example, there were not enough samples for several positive indicators of cardiovascular risk factors among Indonesian migrants aged  $\geq 60$  years. Therefore, migrants from Thailand, Uzbekistan, Sri Lanka, Mongolia, Bangladesh, Pakistan, Indonesia, and India were combined and defined as ‘other Asian migrants’ collectively as age standardisation resulted in insufficient data on specific positive outcome indicators (17).

## **Measurements**

Age, sex, and monthly insurance premiums were included in the data collected by the NHIS, and insurance premiums were determined by income level in Korea (11, 15). In our study, monthly insurance premiums were used to indicate economic status (first, second, third, and fourth quartiles), which was regarded as a vital statistic that represented income level (low, middle-low, high-middle, and high, respectively). The health check-up participation data were obtained from the NHIS health check-up database. According to the information in the health questionnaires, participants were categorised as non-smokers, ex-smokers, or current smokers, alcohol drinkers (alcohol consumption  $\geq 1$  time/week) or non-drinkers (alcohol consumption  $<1$  time/week); and physically active (physical activity  $\geq 3$  times/week) or inactive (physical activity  $<3$  times/week).

Measurements of weight, height, and blood pressure were included in the physical exams, and the

body mass index (BMI) was calculated as the weight (kg) divided by the height (m<sup>2</sup>). Obesity was defined as a BMI  $\geq 25$  kg/m<sup>2</sup>. Elevated blood pressure (hypertension) was defined as a blood pressure  $\geq 140/90$  mmHg, diagnosis of hypertension, or prescription of antihypertensive drugs in the health questionnaires. Furthermore, total cholesterol and fasting blood glucose were included in the laboratory tests, and hypercholesterolemia was defined as total cholesterol  $\geq 240$  mg/dL. Diabetes was defined as a fasting blood glucose  $\geq 126$  mg/dL, previous diabetes diagnosis, or prescription of antidiabetic drugs in the health questionnaires (17).

The primary study outcome was the prevalence of cardiovascular risk factors such as obesity, diabetes, and hypertension (18, 19). The secondary study outcomes were the incidence of T2D and hypertension. We excluded participants with diabetes and hypertension at the first health check-up to ascertain incident T2D and hypertension. Incident T2D and hypertension were determined for each participant between the first and last health check-up (17).

### **Statistical analysis**

Overall, we hypothesised that Asian migrants of different nationalities have a greater health advantage in terms of cardiovascular risk factors than Koreans (17). We conducted several sets of analyses. First, the age-adjusted prevalence of lifestyle factors, socioeconomic status, and health status among Asian migrants and the native population, according to nationality, were calculated. The age-adjusted prevalence was calculated separately by sex using direct age standardisation. Prevalence was defined as the number of participants with cases, in a given year, per number of participants in the population who underwent a health check-up during this period. With regard to the age-adjusted prevalence of lifestyle factors, socioeconomic status, and health status among Chinese, Japanese, Filipino, Vietnamese, and other Asian migrants, compared with Koreans, age standardisation was conducted using 10-year age bands, in which the world standard population

was used as the standard population (20). However, we selected a study population aged  $\geq 30$  years for age standardisation in diabetes because there were not enough samples among Japanese migrants aged 20–29 years, compared with those of Koreans. We selected a study population aged 20–59 years for age standardisation in current smokers because there were not enough samples among Filipino and Vietnamese migrants aged  $\geq 60$  years. In addition, we calculated the age-specific and age-adjusted prevalence of lifestyle factors, socioeconomic status, and health status among Chinese, Filipino, Vietnamese, and other Asian migrants, compared with Koreans separately by sex. To this end, we used direct age standardisation in migrants aged 20–29, 30–39, and 40–49 years, in which the world standard population was used as the standard population (20). With regards to direct age standardisation between 20–49 years, Japanese migrants were excluded due to insufficient data for Japanese migrants aged 20–29 years. For these analyses, we also examined the prevalence rate ratios and 95% log-normal confidence intervals (21).

Second, to examine the differences in the development of T2D and hypertension between Asian migrants and the native population according to nationality, multivariable logistic regression analyses were conducted and adjusted for the following covariates: age (continuous, years), sex, economic status, BMI (continuous,  $\text{kg}/\text{m}^2$ ), smoking status, alcohol use, and physical activity. For these analyses, adjusted odds ratios (aORs) and 95% confidence intervals (CIs) of incident T2D and hypertension determinants were examined between the first and last health check-ups. In addition, we conducted multivariable logistic regression analyses stratified by age (20–39 and  $\geq 40$  years) and sex (17).

Finally, we examined differences in the age-adjusted prevalence of obesity, elevated blood pressure, and diabetes among Chinese, Filipino, and Vietnamese migrants, compared with the general population in their home countries (17). Age standardisation was conducted using 10-year age bands, and the world standard population was used as the standard population (19). However, Japanese migrants were excluded due to insufficient data in Japanese migrants aged 20–29 years.



Health data among general populations in China, the Philippines, and Vietnam were obtained from the Global Health Observatory data repository of the World Health Organization. Data are available from <http://apps.who.int/gho/data/node.main.A867?lang=en/>.

All analyses were performed using SAS version 9.3 (SAS Institute Inc., Cary, NC, USA), and a P-value <0.05 was considered statistically significant.

## Results

This study investigated the nationwide population of Korea (2,680,495 adults). From 2009-2015, a total of 987,214 Asian migrants aged  $\geq 20$  years who received health check-ups were identified in Korea. In addition, 1,693,281 Koreans aged  $\geq 20$  years who received health check-ups from the national one million-sample cohort were also identified. The characteristics of Asian migrants and the native population, according to nationality, are shown in Table 1.

In 2015, the age-adjusted prevalence of current smokers was higher in Chinese migrant men (52.8%) than in Korean men (39.9%) ( $P < 0.0001$ ). The age-adjusted prevalence of obesity in Chinese migrant women (25.6%) was higher than that in Korean women (23.2%) ( $P < 0.0001$ ). In addition, the age-adjusted prevalence of obesity in Filipino migrant women (30.9%) was higher than that in Korean women (23.2%) ( $P = 0.0023$ ). Moreover, the age-adjusted prevalence of hypercholesterolemia was higher in Vietnamese migrant men (12.9%) than in Korean men (10.2%) ( $P = 0.0161$ ). The age-adjusted prevalence of hypercholesterolemia in Vietnamese migrant women (12.9%) was higher than that in Korean women (9.5%) ( $P = 0.0008$ ). Furthermore, the age-adjusted prevalence of current smokers was higher in other Asian migrant women (6.4%) than in Korean women (3.8%) ( $P < 0.0001$ ). The age-adjusted prevalence of obesity in other Asian migrant women (35.5%) was higher than that in Korean women (23.2%) ( $P < 0.0001$ ) (Table 2).

In 2015, among participants aged 30–39 years, the prevalence of diabetes in Chinese migrant men (4.1%) was higher than that in Korean men (3.5%) (aPR, 1.20; 95% CI, 1.07–1.33). Among participants 40–49 years old, the prevalence of hypertension in Chinese migrant women (10.7%) was higher than that in Korean women (9.7%) (aPR, 1.10; 95% CI, 1.04–1.17) (Supplementary Table A1 and A2).

In 2015, among participants aged 20–49 years old, the age-adjusted prevalence of diabetes in Filipino migrant women (2.6%) was higher than that in Korean women (1.8%) (aPR, 1.49; 95% CI, 1.11–2.02;  $P = 0.0090$ ). The age-adjusted prevalence of hypertension in Filipino migrant

women (7.7%) was higher than that in Korean women (4.2%) (aPR, 1.81; 95% CI, 1.48–2.21;  $P < 0.0001$ ) (Figure 1 and Supplementary Table B2).

From 2009-2015, the number of participants who underwent health check-ups more than once and had diabetic information was 505,342. The number of participants with incident T2D between the first and last health check-up was 22,284. In the multivariate analyses, compared with the native population, the OR for developing T2D was 0.82 (95% CI, 0.78–0.86) among Asian migrants. Compared to Koreans, Chinese (aOR, 0.81; 95% CI, 0.77–0.86), Japanese (aOR, 0.67; 95% CI 0.49–0.92), and other Asian (aOR, 0.80; 95% CI, 0.74–0.86) migrants were less likely to develop T2D after adjusting for covariates. However, among Vietnamese migrant men aged 20–39 years, the OR for developing T2D was 1.32 (95% CI, 1.11–1.57) compared with that in Korean men (Figure 2).

From 2009-2015, the number of participants who received health check-ups more than once and had hypertensive information was 431,433, and the number of participants with hypertension between the first and last health check-ups was 48,007. In the multivariate analyses, compared with the native population, the OR for developing hypertension was 0.77 (95% CI, 0.75–0.79) among Asian migrants. Compared with Koreans, Chinese (aOR, 0.83; 95% CI, 0.80–0.86), Filipino (aOR, 0.91; 95% CI, 0.83–0.99), Vietnamese (aOR, 0.60; 95% CI, 0.53–0.67), and other Asian (aOR, 0.64; 95% CI, 0.60–0.67) migrants were less likely to develop hypertension after adjusting for covariates. However, compared with Korean women, the ORs of developing hypertension were 1.49 (95% CI, 1.05–2.11) and 2.22 (95% CI, 1.17–4.19) among Filipino migrant women aged 20–39 years and >40 years, respectively (Figure 3).

Compared to the general population in their home countries, we found that most Asian migrants in Korea were healthier in terms of the prevalence of obesity, diabetes, and elevated blood pressure. However, the age-adjusted prevalence of obesity (41.4%) in Filipino migrant men was higher than that in men from the general population in the Philippines (30.4%) in 2015. In addition,

in 2014, the age-adjusted prevalence of diabetes (12.5%) among Filipino migrant men was higher than that in men from the general population in the Philippines (7.1%) (Figure 4B).

## Discussion

The results of this study suggest that Chinese and Japanese migrants have an overall health advantage in terms of cardiovascular risk factors, especially diabetes and hypertension in 2015. However, the health advantage might disappear among Filipino, Vietnamese, and other Asian migrants, especially migrant women. Specifically, among participants aged 30-39 years, Chinese migrant men had a higher prevalence of diabetes than Korean men; among participants aged 40-49 years, Chinese migrant women had a higher prevalence of hypertension than Korean women. Among Filipino migrants aged 20-49 years, the age-adjusted prevalence of diabetes and hypertension was higher in Filipino migrant women than that in Korean women in 2015. Between 2009 and 2015, most Asian migrants were less likely to develop T2D and hypertension than Koreans. Moreover, in multivariate analyses, among participants aged 20-39 years, Vietnamese migrant men were more likely to have T2D than Korean men. Among participants aged  $\geq 20$  years, Filipino migrant women were more likely to develop hypertension than Korean women after adjusting for covariates. Compared with the general population in the home countries, we found that the prevalence of obesity, diabetes, and elevated blood pressure was lower among most Asian migrants in Korea. However, the prevalence of obesity and diabetes in Filipino migrant was higher than that in the Philippine general population.

### Strengths and weaknesses of the study

Our study has several strengths. First, this was a large-scale ecological study comparing the prevalence of cardiovascular risk factors among Asian migrants of different nationalities and the host population in Asia, using large data. Second, longitudinal data were collected to examine differences according to nationality in newly diagnosed T2D and hypertension between Asian migrants and Koreans. Third, the differences in obesity, diabetes, and elevated blood pressure were investigated between various Asian migrants and the general populations in their home countries, using direct standardisation with the wor

-ld standard population.

Our study has several limitations. First, the total cases of diabetes and hypertension were underestimated because we only selected people who had national health insurance and underwent health check-ups. In addition, the study population may have been healthier than the whole population if they paid more attention to their health and made full use of medical resources. However, from 2009 to 2015, the prevalence of diabetes in Korean men and women aged  $\geq 20$  years showed an increasing trend, which is consistent with the results of a recent study on Korean adults aged  $\geq 30$  years based on the Korean National Health and Nutrition Examination Survey (11, 17, 22). Among Korean men and women aged  $\geq 30$  years, the prevalence of diabetes in the NHID health check-up database in 2015 was 12.3% and 7.6%, respectively, which is similar to the prevalence of diabetes using data from the Korean National Health and Nutrition Examination Survey of 2009–2013 (11.4% and 8.7%, respectively) (11, 17, 22). Moreover, Asian migrants may be more likely to be underestimated than Koreans, with diabetes and hypertension in our study (11). For example, in Singapore, although international migrant workers have national health insurance when employed, they may not utilise necessary health services or even know that they have been covered (23). Second, we did not adjust for family history, nutritional factors, stress and depression in the statistical modelling of examining the relationship between Asian migrants according to nationality and newly diagnosed T2D or hypertension, compared with Koreans. Third, due to limited use of data on the type of migrant, migrant status factors were not considered; however, we use economic status instead of migrant status to compensate (11).

### **Comparison with previous studies**

In our study, the age-adjusted prevalence rates of obesity were higher in Chinese, Filipino and other Asian migrant women than in Korean women among participants aged  $\geq 20$  years. In migrants, unhealthy diets, lack of physical activity, low socioeconomic status, genetics, and the

interaction of genetics and the environment may lead to obesity, diabetes , and hypertension (9, 24-26). Moreover, obesity is one of the major health problems of migrants, especially migrant women (27). However, compared with Koreans, we cannot find a clear pattern of concurrence between obesity and diabetes/hypertension among Asian migrants. This is consistent with previous research, which showed that there was no concurrence pattern between obesity and T2D for international migrants from the Western Pacific to Europe (including Chinese and Vietnamese migrants) (27). However, among participants aged 40-49 years, Chinese migrant women had a higher prevalence of hypertension than Korean women. In addition, there was only a clear pattern of concurrence between obesity and hypertension in Chinese migrant women aged 40-49 years, Therefore, stress and obesity may be the main factors contributing to hypertension (9, 17, 28-30). Among Filipino migrant women aged 20-49 years, we found a distinct pattern of concurrence between obesity and diabetes/hypertension compared with Korean women, probably due to unhealthy diets, lack of exercise, early life factors, poor adherence to medication, low socioeconomic status, and genetic and genetic-environmental interactions (9, 24-26). Furthermore, the stress generated by adapting to a new cultural process may contribute to a greater prevalence of hypertension among Filipino migrant women aged 20-49, and this appears to be more important than unhealthy diets or lack of exercise (29, 30).

In 2015, among participants aged 30-39 years, Chinese migrant men had a greater prevalence of diabetes than Korean men, whereas Filipino migrant women had a greater prevalence of diabetes than Korean women. Therefore, the migrant age group of 30-39 years might be more susceptible to diabetes after several migrant-related lifestyle changes (9, 24-26). The majority of Asian migrants were less likely to have T2D and hypertension than Koreans (11, 17). However, from 2009 to 2015, among participants aged 20-39 years, Vietnamese migrant men were more likely to have T2D than Korean men. This finding is consistent with previous studies, which showed that international migrants developed diabetes 10-20 years earlier than the local population of host countries (9, 31, 32). Moreover, considering the important

relationship between the pressure of cultural changes and elevated blood pressure among migrants (17, 29, 30), the reason why most Asian migrants were less likely to develop hypertension than Koreans might be that with similar cultures and a relatively close geographic location to their home country. Asian migrants might be more likely to adapt to the social environment of Korea and maintain large social networks and ensure sufficient social support. These factors might help Asian migrants in Korea reduce stress and deal with conflicts more easily in adapting to a different society. However, Filipino migrant women were more likely to have hypertension than Korean women. This might be caused by the cultural and social problems of Filipino women during the process of acculturation to Korea (29, 30).

Compared with the general population in their home countries, we found that most Asian migrants in Korea were healthier in terms of the prevalence of obesity, diabetes and hypertension. Moreover, from 2009 to 2015, the age-adjusted prevalence of diabetes, hypertension, and hypercholesterolemia among most Asian migrants, regardless of gender, was lower than that in Korea (11). Therefore, this study explains the healthy migration hypothesis through self-selection and immigration policies (3-6, 11). However, compared with the general population in the Philippines, the prevalence of obesity and diabetes among Filipino migrant men was greater. Based on the expert review of non-communicable diseases for migrants, an unhealthy diet, lack of physical activity, low socioeconomic status, genetics, and the interaction between genetics and the environment may lead to obesity and diabetes among Filipino migrant men in Korea (9, 24-26).

### **Healthy migrant hypotheses and implications for clinicians and policymakers**

In 2015, among Chinese and Japanese migrants, there was an overall health advantage in terms of cardiovascular risk factors, especially diabetes and hypertension. However, for both men and women, the age-adjusted prevalence of diabetes and hypertension in Filipino migrants was similar to that in Koreans. The age-adjusted prevalence of diabetes in Vietnamese migrant women was similar to that in Korean women, whereas the age-adjusted prevalence of diabetes and



hypertension in other Asian migrant women was similar to that in Korean women. In the period 2009-2015, based on the findings of this study and previous studies, the healthy migrant effect is gradually disappearing, especially considering the increasing trends of obesity among Asian migrants in Korea (2, 7, 8, 11, 17). Therefore, the health advantages of Filipino, Vietnamese, and other Asian migrants, especially migrant women, might disappear.

In conclusion, there is a need for primary and secondary prevention of T2D and hypertension among Asian migrants in Korea, especially for age and sex specific groups according to nationality. In addition, the problem of obesity among Asian migrants in Korea, especially in Asian migrant women, should be addressed. The relationship between Asian migrants and cardiovascular risk factors by nationality could provide basic evidence for targeting high-risk groups and improving policy development in Korea.

We thank Carol Brayne and Caroline Lee (University of Cambridge), Jae-Heon Kang (Sungkyunkwan University), and Jong-Koo Lee and Young-Ho Khang (Seoul National University) for their constructive suggestions and comments. We also thank Editage ([www.editage.co.kr](http://www.editage.co.kr)), Luyao Zhang (Zhengzhou University), and Mohamed S. Bangura (Dalian Medical University), for English language editing.

**Contributors:** HP, JMY, AS, and BC conceived the study. HP wrote the first and successive drafts of the manuscript. HP modelled and analysed the data. HP, JMY, and AS contributed to study conception and design. JMY, AS, and DK contributed to data analysis. All authors revised the manuscript for important intellectual content. HP and BC had full access to the data and take responsibility for the integrity of the data and the accuracy of the data analysis. HP is the guarantor.

**Competing interests:** All authors have completed the ICMJE uniform disclosure form at [www.icmje.org/coi\\_disclosure.pdf](http://www.icmje.org/coi_disclosure.pdf) and declare: no support from any organisation for the submitted work; no financial relationships with any organisations that might have an interest in the submitted work in the previous three years; no other relationships or activities that could

appear to have influenced the submitted work.

**Ethical approval:** Not required.

**Data sharing:** No additional data available.

**Funding:** No financial support available.

**Transparency:** The lead author HP affirm that his manuscript is an honest, accurate, and transparent account of the study being reported; and that no important aspects of the study have been omitted; and that any discrepancies from the study as planned (and, if relevant, registered) have been explained.

This is an Open Access article distributed in accordance with the terms of the Creative Commons Attribution (CC BY 4.0) license, which permits others to distribute, remix, adapt and build upon this work, for commercial use, provided the original work is properly cited. See: <http://creativecommons.org/licenses/by/4.0/>.

## References

1. Aldridge RW, Nellums LB, Bartlett S, et al. Global patterns of mortality in international migrants: a systematic review and meta-analysis. *Lancet* 2018;392(10164):2553-66.
2. Vang ZM, Sigouin J, Flenon A, Gagnon A. Are immigrants healthier than native-born Canadians? A systematic review of the healthy immigrant effect in Canada. *Ethn Health* 2017;22(3):209-41.
3. Kennedy S, Kidd MP, McDonald JT, Biddle N. The healthy immigrant effect: patterns and evidence from four countries. *JIMI* 2015;16(2):317-32.
4. McDonald JT, Kennedy S. Insights into the 'healthy immigrant effect': health status and health service use of immigrants to Canada. *Soc Sci Med* 2004;59(8):1613-27.
5. Chiswick BR, Lee YL, Miller PW. Immigrant selection systems and immigrant health. *Contemp Econ Policy* 2008;26(4):555-78.
6. Marmot MG, Adelstein AM, Bulusu L. Lessons from the study of immigrant mortality. *Lancet* 1984;1(8392):1455-7.
7. Argeseanu Cunningham S, Ruben JD, Narayan KM. Health of foreign-born people in the United States: a review. *Health Place* 2008;14(4):623-35.
8. Rechel B, Mladovsky P, Ingleby D, Mackenbach JP, McKee M. Migration and health in an increasingly diverse Europe. *Lancet* 2013;381(9873):1235-45.
9. Agyemang C, Born B-Jvd. Non-communicable diseases in migrants: an expert review. *J Travel Med* 2018;26(2):tay107.
10. Commodore-Mensah Y, Ukonu N, Obisesan O, et al. Length of residence in the United States is associated with a higher prevalence of cardiometabolic risk factors in immigrants: a contemporary analysis of the National Health Interview Survey. *J Am Heart Assoc* 2016;5(11):e004059.
11. Piao H, Yun JM, Shin A, Cho B. Longitudinal study of diabetic differences between international migrants and natives among the Asian population. *Biomol Ther (Seoul)* 2020;28(1):110-8.
12. Seong SC, Kim Y-Y, Khang Y-H, et al. Data resource profile: the national health information database of the National Health Insurance Service in South Korea. *Int J Epidemiol* 2016;46(3):799-800.
13. Song SO, Jung CH, Song YD, et al. Background and data configuration process of a nationwide population-based study using the Korean national health insurance system. *Diabetes Metab* 2014;38(5):395-403.
14. Lee YH, Han K, Ko SH, Ko KS, Lee KU; Taskforce Team of Diabetes Fact Sheet of the

Korean Diabetes Association. Data Analytic Process of a Nationwide Population-Based Study Using National Health Information Database Established by National Health Insurance Service. *Diabetes Metab* 2016;40(1):79-82.

15. Lee H, Cho J, Shin DW, et al. Association of cardiovascular health screening with mortality, clinical outcomes, and health care cost: a nationwide cohort study. *Prev Med* 2015;70:19-25.
16. Lee J, Lee JS, Park S-H, Shin SA, Kim K. Cohort profile: the national health insurance service–national sample cohort (NHIS-NSC), South Korea. *Int J Epidemiol* 2017;46(2):e15-e.
17. Piao H. A comparison of cardiovascular risk factors among Asian migrants and the native population in Korea [dissertation]. Seoul (SEL): *Seoul National University* 2020.
18. Grundy SM, Cleeman JI, Daniels SR, et al. Diagnosis and management of the metabolic syndrome: an American Heart Association/National Heart, Lung, and Blood Institute scientific statement. *Circulation* 2005;112(17):2735-52.
19. O'Donnell CJ, Elosua R. Cardiovascular risk factors. Insights from Framingham Heart Study. *Rev Esp Cardiol* 2008;61(3):299-310.
20. Ahmad OB, Boschi-Pinto C, Lopez AD, Murray CJ, Lozano R, Inoue M. Age standardization of rates: a new WHO standard. J Geneva: World Health Organization. 2001;9(10).
21. Barros AJ, Hirakata VN. Alternatives for logistic regression in cross-sectional studies: an empirical comparison of models that directly estimate the prevalence ratio. *BMC Med Res Methodol* 2003;3:21.
22. Lee J-w, Kang H-T, Lim H-J, Park B. Trends in diabetes prevalence among Korean adults based on Korean National Health and Nutrition Examination Surveys III–VI. *Diabetes Res Clin* 2018;138:57-65.
23. Ang JW, Chia C, Koh CJ, et al. Healthcare-seeking behaviour, barriers and mental health of non-domestic migrant workers in Singapore. *BMJ Global Health* 2017;2(2):e000213.
24. Agyemang C, van Oeffelen AA, Norredam M, et al. Socioeconomic inequalities in stroke incidence among migrant groups: analysis of nationwide data. *Stroke* 2014;45(8):2397-403.
25. Agyemang C, Beune E, Meeks K, et al. Rationale and cross-sectional study design of the Research on Obesity and type 2 Diabetes among African Migrants: the RODAM study. *BMJ Open* 2014;4(3):e004877.
26. Misra A, Ganda OP. Migration and its impact on adiposity and type 2 diabetes. *Nutrition* 2007;23(9):696-708.
27. Meeks KA, Freitas-Da-Silva D, Adeyemo A, et al. Disparities in type 2 diabetes prevalence among ethnic minority groups resident in Europe: a systematic review and meta-analysis. *Intern Emerg Med* 2016;11(3):327-40.

28. Commodore-Mensah Y, Samuel LJ, Dennison-Himmelfarb CR, Agyemang C. Hypertension and overweight/obesity in Ghanaians and Nigerians living in West Africa and industrialized countries: a systematic review. *J Hypertens* 2014;32(3):464-72.
29. Gibson J, Stillman S, McKenzie D, Rohorua H. Natural experiment evidence on the effect of migration on blood pressure and hypertension. *Health Econ* 2013;22(6):655-72.
30. Steffen PR, Smith TB, Larson M, Butler L. Acculturation to Western society as a risk factor for high blood pressure: a meta-analytic review. *Psychosom Med* 2006;68(3):386-97.
31. Snijder MB, Agyemang C, Peters RJ, Stronks K, Ujic-Voortman JK, van Valkengoed IG. Case finding and medical treatment of type 2 diabetes among different ethnic minority groups: the HELIUS study. *J Diabetes Res* 2017;2017:9896849.
32. Mather HM, Chaturvedi N, Fuller JH. Mortality and morbidity from diabetes in South Asians and Europeans: 11-year follow-up of the Southall Diabetes Survey, London, UK. *Diabet Med* 1998;15(1):53-9.

**Table 1.** Characteristics of Asian migrant and native population aged 20 years and older who received health check-ups, according to nationalities in 2015\*

| Variable                             | Native       |              |              | Migrant      |              |              |
|--------------------------------------|--------------|--------------|--------------|--------------|--------------|--------------|
|                                      | Korean       | Chinese      | Japanese     | Filipino     | Vietnamese   | Other Asian  |
| N                                    | 266,162      | 101,223      | 4,445        | 11,888       | 19,224       | 63,765       |
| Age (years)                          | 49.4 ± 14.0  | 46.4 ± 11.4  | 47.4 ± 9.2   | 32.5 ± 6.0   | 30.3 ± 9.2   | 30.3 ± 6.3   |
| Sex (%)                              |              |              |              |              |              |              |
| Men                                  | 53.1         | 52.8         | 28.7         | 80.3         | 70.9         | 92.7         |
| Women                                | 46.9         | 47.2         | 71.3         | 19.7         | 29.1         | 7.3          |
| Economic status (%)                  |              |              |              |              |              |              |
| 1st quartile (low)                   | 15.5         | 23.4         | 24.5         | 34.9         | 27.4         | 28.0         |
| 2nd quartile                         | 25.0         | 45.1         | 19.2         | 53.2         | 53.1         | 57.5         |
| 3rd quartile                         | 21.3         | 27.9         | 25.3         | 10.6         | 18.0         | 12.9         |
| 4th quartile (high)                  | 38.2         | 3.6          | 31.0         | 1.3          | 1.5          | 1.6          |
| Body mass index (kg/m <sup>2</sup> ) | 24.0 ± 3.4   | 23.7 ± 3.3   | 23.2 ± 3.6   | 24.1 ± 3.1   | 21.8 ± 2.4   | 23.3 ± 3.2   |
| Systolic blood pressure (mm Hg)      | 122.1 ± 14.5 | 121.6 ± 14.8 | 117.6 ± 14.3 | 121.2 ± 12.8 | 115.7 ± 12.0 | 118.8 ± 12.0 |
| Fasting serum glucose (mg/dl)        | 99.8 ± 24.2  | 97.7 ± 21.9  | 95.4 ± 19.1  | 94.5 ± 18.6  | 90.3 ± 14.9  | 91.4 ± 16.8  |
| Total serum cholesterol (mg/dl)      | 195.3 ± 38.9 | 190.4 ± 38.0 | 205.4 ± 38.2 | 192.0 ± 37.6 | 182.8 ± 37.5 | 185.0 ± 37.5 |
| Smoking status (%)                   |              |              |              |              |              |              |
| Ex-smokers                           | 18.0         | 10.7         | 10.6         | 4.2          | 4.1          | 4.1          |
| Current smokers                      | 21.5         | 28.7         | 9.5          | 19.8         | 20.1         | 30.9         |
| Any alcohol use (%)                  | 50.1         | 46.2         | 30.5         | 46.4         | 39.9         | 37.9         |
| Physical activity (%)                | 70.2         | 51.6         | 64.4         | 49.9         | 49.1         | 45.4         |

\*Data are expressed as the means ± SD, or %.

**Table 2A.** Age-adjusted prevalence of lifestyle factors, socioeconomic situation, and health status estimates among Asian migrant men, compared to Korean men aged 20 years and older who received health check-ups in 2015

| Variable                       | Age-adjusted prevalence (95% CI)* |                  |                     |                  |                  |                  |                |                      |
|--------------------------------|-----------------------------------|------------------|---------------------|------------------|------------------|------------------|----------------|----------------------|
| Men                            | Current smokers                   | Any alcohol use  | Physical inactivity | Low income level | Obesity          | Hypertension     | Diabetes       | Hypercholesterolemia |
| Korean                         | 39.9 (39.5–40.3)                  | 70.3 (69.8–70.9) | 24.8 (24.5–25.1)    | 10.9 (10.7–11.1) | 41.7 (41.3–42.1) | 22.4 (22.2–22.7) | 9.6 (9.5–9.8)  | 10.2 (10.0–10.4)     |
| Asian migrant                  |                                   |                  |                     |                  |                  |                  |                |                      |
| Chinese                        | 52.8 (52.1–53.6)                  | 68.6 (67.8–69.4) | 45.8 (45.1–46.4)    | 19.6 (19.2–20.1) | 35.6 (35.0–36.2) | 20.4 (20.0–20.8) | 7.4 (7.2–7.7)  | 7.6 (7.4–7.9)        |
| <i>P</i> value for difference† | < 0.0001                          | 0.0004           | < 0.0001            | < 0.0001         | < 0.0001         | < 0.0001         | < 0.0001       | < 0.0001             |
| Japanese‡                      | 26.8 (22.1–31.5)                  | 70.4 (63.3–77.5) | 27.8 (23.4–32.3)    | 10.4 (6.7–14.0)  | 37.9 (32.5–43.3) | 18.3 (15.7–20.9) | 8.0 (6.3–9.7)  | 14.4 (11.6–17.1)     |
| <i>P</i> value for difference† | < 0.0001                          | 0.9896           | 0.1608              | 0.7779           | 0.1869           | 0.0055           | < 0.0001       | 0.0004               |
| Filipino§                      | 23.0 (20.0–26.0)                  | 49.6 (40.1–59.1) | 52.9 (49.4–56.5)    | 28.6 (20.9–36.2) | 41.4 (31.9–51.0) | 20.8 (10.3–31.3) | 8.9 (3.2–14.5) | 11.2 (5.9–16.5)      |
| <i>P</i> value for difference† | < 0.0001                          | 0.0004           | < 0.0001            | < 0.0001         | 0.9575           | 0.7717           | 0.8043         | 0.6949               |
| Vietnamese§                    | 33.2 (30.8–35.5)                  | 51.0 (47.0–54.9) | 51.5 (47.1–55.9)    | 21.7 (18.8–24.7) | 13.5 (11.3–15.6) | 9.2 (6.7–11.6)   | 3.4 (2.1–4.8)  | 12.9 (10.4–15.4)     |
| <i>P</i> value for difference† | < 0.0001                          | < 0.0001         | < 0.0001            | < 0.0001         | < 0.0001         | < 0.0001         | < 0.0001       | 0.0161               |
| Other Asian                    | 35.8 (31.6–39.2)                  | 45.4 (41.4–49.4) | 52.9 (49.4–56.5)    | 24.0 (21.7–26.3) | 38.3 (34.6–42.1) | 18.4 (14.9–22.0) | 5.1 (3.8–6.5)  | 9.9 (8.4–11.4)       |
| <i>P</i> value for difference† | 0.0264                            | < 0.0001         | < 0.0001            | < 0.0001         | 0.0917           | 0.0462           | < 0.0001       | 0.7087               |

\* Data are expressed as %; age standardization with 10-year age bands; the world standard population was used as the standard population.

† *P* value for difference was calculated among Asian migrant men compared with Korean men, according to nationality

‡ Age standardisation in diabetes was calculated among Japanese men aged ≥ 30 years, compared with Korean men

§ Age standardisation in current smokers were calculated among Filipino and Vietnamese men aged 20-59 years, compared with Korean men

**Table 2B.** Age-adjusted prevalence of lifestyle factors, socioeconomic situation, and health status estimates among Asian migrant women, compared to Korean women aged 20 years and older who received health check-ups in 2015

| Variable                       | Age-adjusted prevalence (95% CI)* |                  |                     |                  |                  |                  |               |                      |
|--------------------------------|-----------------------------------|------------------|---------------------|------------------|------------------|------------------|---------------|----------------------|
|                                | Current smokers                   | Any alcohol use  | Physical inactivity | Low income level | Obesity          | Hypertension     | Diabetes      | Hypercholesterolemia |
| <b>Women</b>                   |                                   |                  |                     |                  |                  |                  |               |                      |
| Korean                         | 3.8 (3.7–4.0)                     | 37.7 (37.3–38.2) | 32.0 (31.6–32.3)    | 19.2 (19.0–19.5) | 23.2 (22.9–23.4) | 16.0 (15.8–16.2) | 5.9 (5.8–6.0) | 9.5 (9.3–9.7)        |
| Asian migrant                  |                                   |                  |                     |                  |                  |                  |               |                      |
| Chinese                        | 2.9 (2.7–3.1)                     | 23.4 (22.8–24.0) | 46.5 (45.8–47.3)    | 29.6 (29.0–30.2) | 25.6 (25.1–26.1) | 14.6 (14.2–14.9) | 4.4 (4.2–4.6) | 8.3 (8.1–8.6)        |
| <i>P</i> value for difference† | < 0.0001                          | < 0.0001         | < 0.0001            | < 0.0001         | < 0.0001         | < 0.0001         | < 0.0001      | < 0.0001             |
| Japanese‡                      | 4.7 (3.2–6.2)                     | 28.9 (24.6–33.3) | 34.5 (31.1–37.9)    | 22.8 (20.4–25.2) | 18.3 (16.0–20.6) | 13.2 (11.2–15.2) | 5.6 (4.0–7.2) | 13.8 (12.0–15.7)     |
| <i>P</i> value for difference† | 0.2068                            | 0.0006           | 0.1397              | 0.0018           | 0.0002           | 0.0124           | 0.0404        | < 0.0001             |
| Filipino§                      | 2.0 (1.3–2.7)                     | 11.9 (8.8–15.0)  | 51.6 (44.9–58.4)    | 42.0 (36.9–47.0) | 30.9 (25.2–36.6) | 19.1 (13.2–24.9) | 5.2 (2.2–8.2) | 11.2 (6.9–15.6)      |
| <i>P</i> value for difference† | < 0.0001                          | < 0.0001         | < 0.0001            | < 0.0001         | 0.0023           | 0.2658           | 0.6717        | 0.3983               |
| Vietnamese§                    | 2.2 (1.1–3.2)                     | 5.0 (4.2–5.7)    | 56.4 (52.9–59.8)    | 38.5 (35.9–41.1) | 12.7 (10.8–14.6) | 10.7 (8.4–13.0)  | 5.6 (3.9–7.3) | 12.9 (10.6–15.2)     |
| <i>P</i> value for difference† | 0.0043                            | < 0.0001         | < 0.0001            | < 0.0001         | < 0.0001         | 0.0003           | 0.7644        | 0.0008               |
| Other Asian                    | 6.4 (4.8–7.9)                     | 12.8 (11.1–14.5) | 53.2 (49.4–57.1)    | 36.3 (33.3–39.3) | 35.5 (31.4–39.5) | 16.1 (12.7–19.6) | 6.0 (3.8–8.1) | 11.4 (9.0–13.9)      |
| <i>P</i> value for difference† | < 0.0001                          | < 0.0001         | < 0.0001            | < 0.0001         | < 0.0001         | 0.9494           | 0.9612        | 0.0935               |

\* Data are expressed as %; age standardization with 10-year age bands; the world standard population was used as the standard population.

† *P* value for difference was calculated among Asian migrant women compared with Korean women, according to nationality

‡ Aged ≥ 30 years for age standardisation in diabetes

§ Aged 20-59 years for age standardisation in current smokers



**Figure 1.** Age-adjusted prevalence ratios of diabetes and hypertension among Asian migrants, compared with Koreans aged 20-49 years who received health check-ups in 2015\*

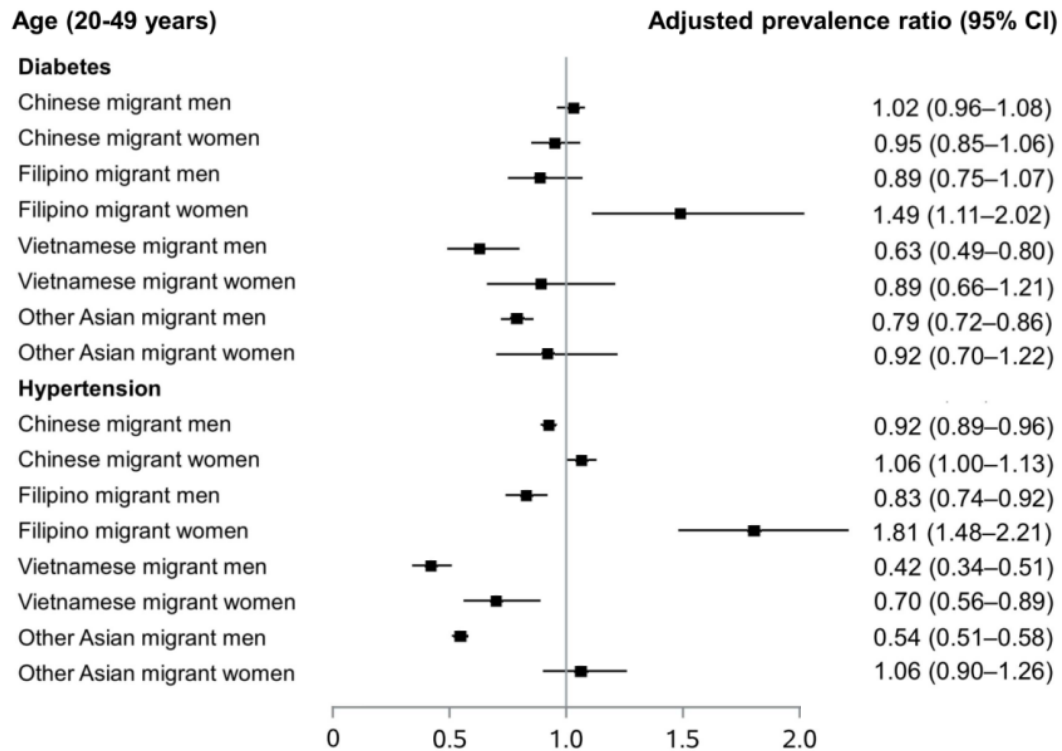

\* Age-adjusted prevalence ratios and 95% confidence intervals (CIs) of diabetes and hypertension were examined; age standardization with 10-year age bands; the world standard population was used as the standard population.

**Figure 2.** Multivariable adjusted odds ratios of developing type 2 diabetes between the first and last health check-ups, according to nationality\*

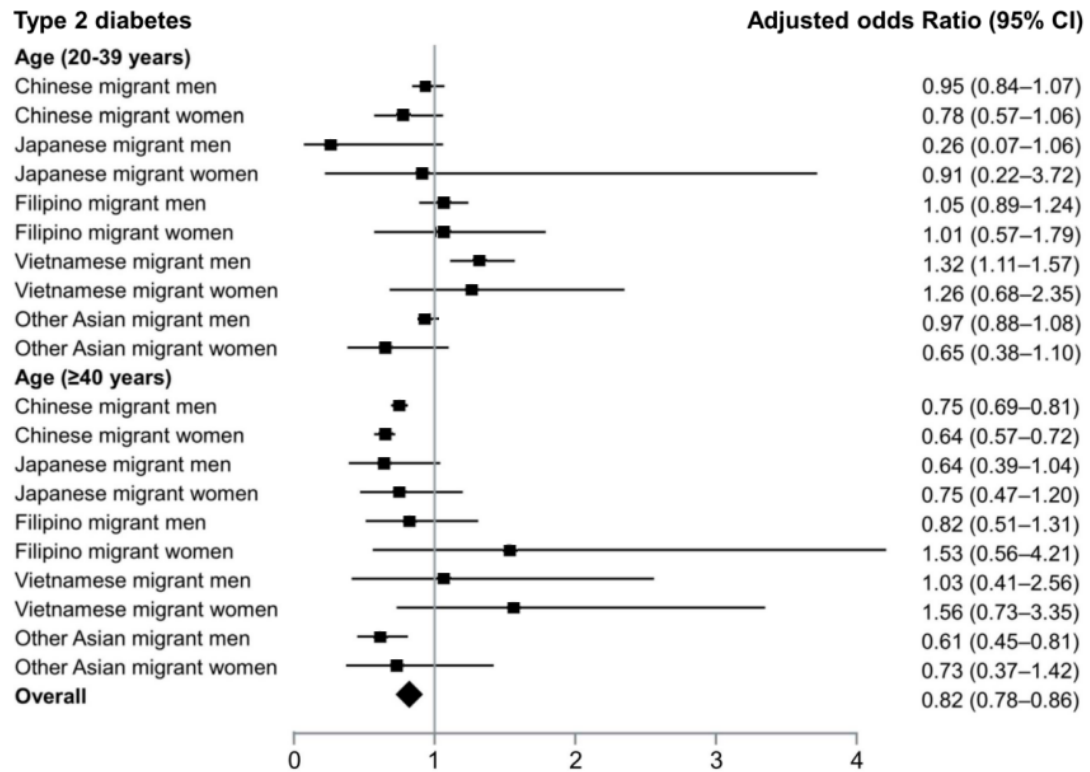

\* Adjusted odds ratios and 95% confidence intervals (CIs) of incident type 2 diabetes determinants were determined using the multivariable logistic regression model; adjusted for age (continuous, years), economic status, BMI (continuous, kg/m<sup>2</sup>), smoking status, any alcohol use, and physical activity.

**Figure 3.** Multivariable adjusted odds ratios of developing hypertension between the first and last health check-ups, according to nationality\*

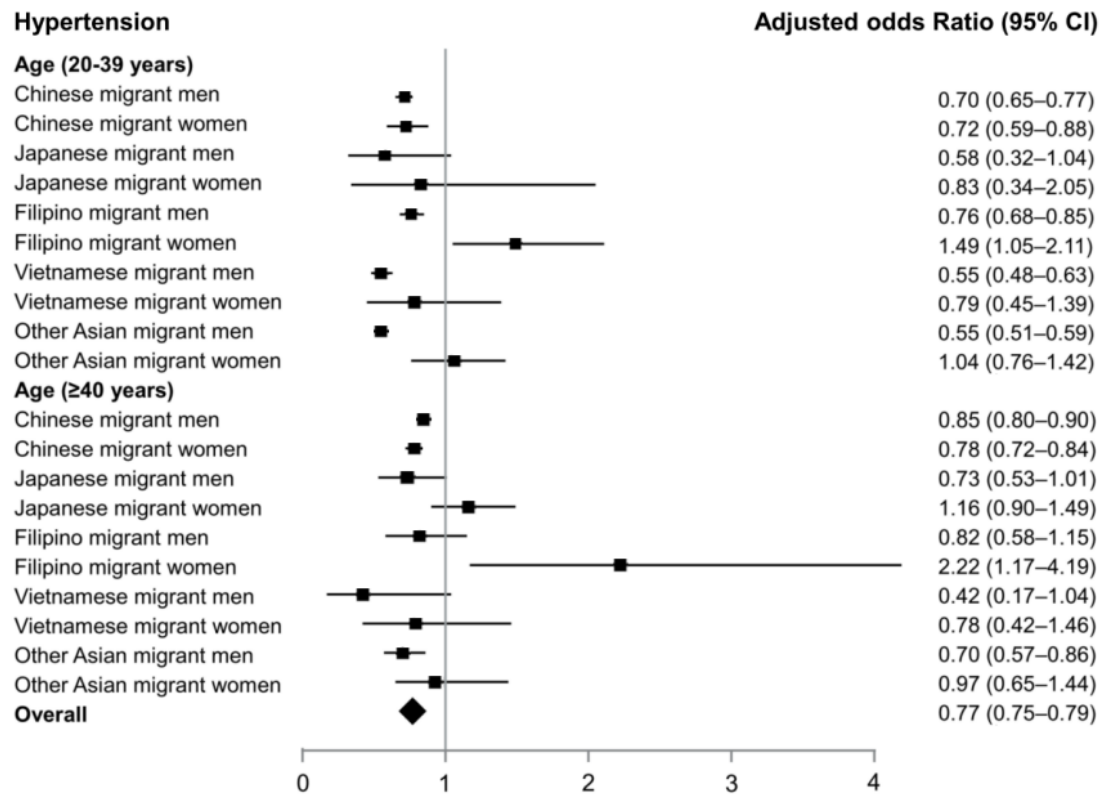

\* Adjusted odds ratios and 95% confidence intervals (CIs) of incident hypertension determinants were determined using the multivariable logistic regression model; adjusted for age (continuous, years), economic status, BMI (continuous, kg/m<sup>2</sup>), smoking status, any alcohol use, and physical activity.

**Figure 4.** Age-adjusted prevalence of obesity, raised blood pressure, and diabetes among Chinese, Filipino, and Vietnamese migrants, compared with the general population in their home countries\*

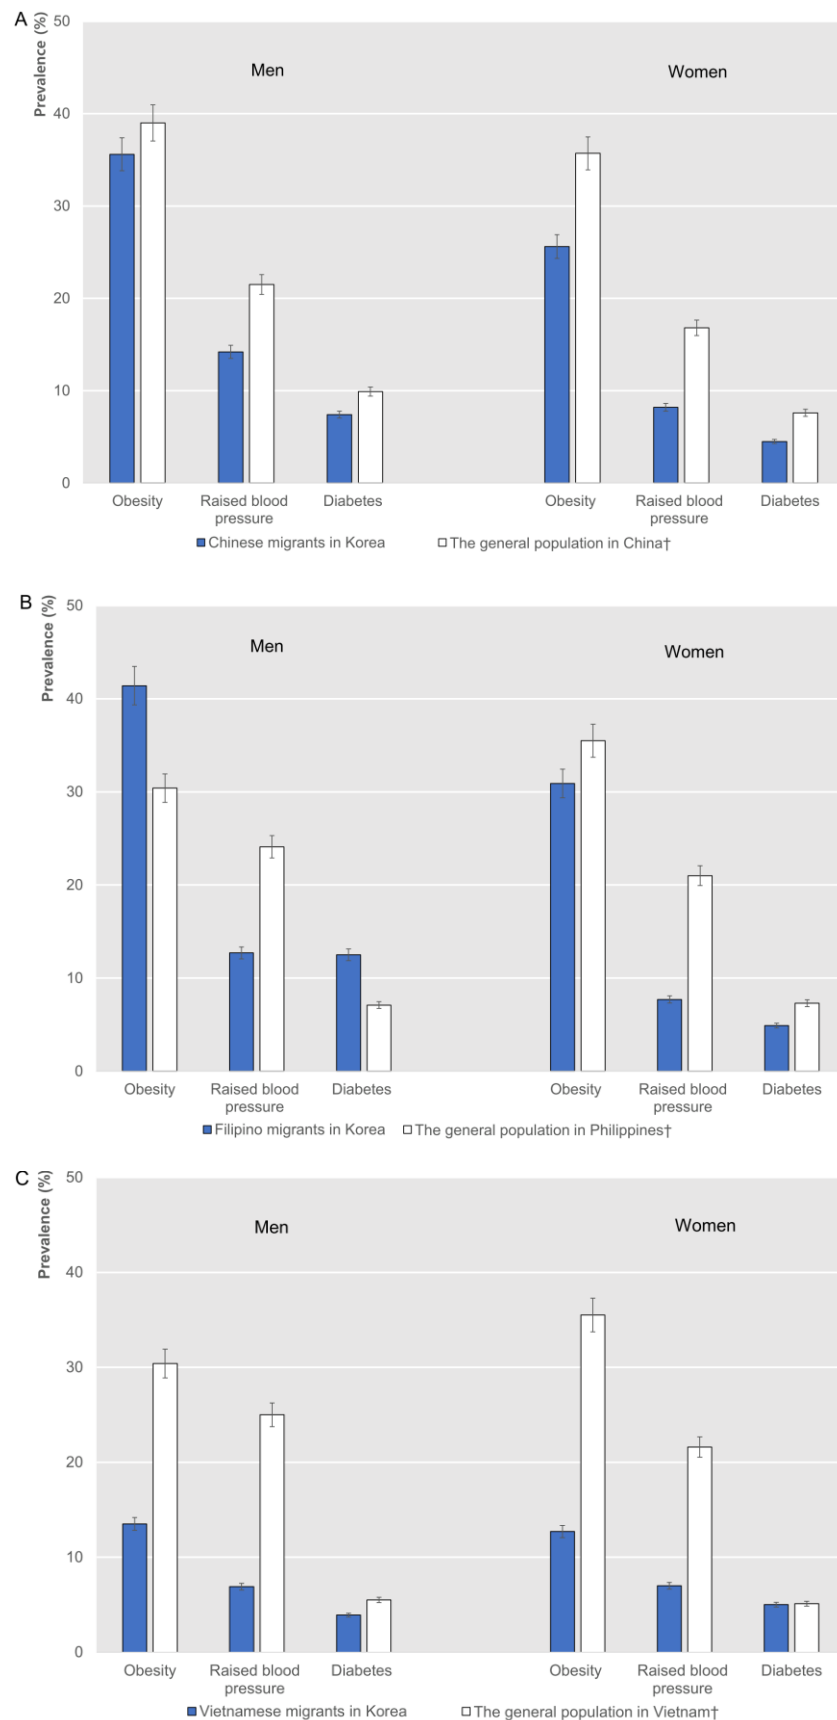

\* Data are expressed as %; age standardization with 10-year age bands; the world standard population was used as the standard population; obesity was defined as a BMI  $\geq 25$  kg/m<sup>2</sup> for the Asian population; raised blood pressure was defined as blood pressure  $\geq 140/90$  mm Hg; diabetes was defined as a fasting blood glucose  $\geq 126$  mg/dL, previous diabetes diagnosis, or prescription of antidiabetic drugs; with regard to obesity and raised blood pressure, we used the data in 2015; with regard to diabetes, we used the data in 2014.

† Source: data from the global health observatory data repository of world health organization. Available from: <http://apps.who.int/gho/data/node.main.A867?lang=en/>.
