# Comparing non-communicable disease risk factors between Asian migrants and native Koreans: an observational study

Heng Piao<sup>1,2\*</sup>, Jae Moon Yun<sup>2</sup>, Aesun Shin<sup>3,4</sup>, Daehee Kang<sup>1,3,4</sup>, Belong Cho  
(<https://orcid.org/0000-0001-9558-689X>)<sup>2,5\*</sup>

*<sup>1</sup>Department of Cancer Epidemiology and Prevention, Henan Cancer Hospital, Affiliate Cancer Hospital of Zhengzhou University, Zhengzhou 450003, China, <sup>2</sup>Department of Family Medicine, Seoul National University Hospital, Seoul National University College of Medicine, Seoul 03080, Republic of Korea, <sup>3</sup>Department of Preventive Medicine, Seoul National University College of Medicine, Seoul 03080, Republic of Korea, <sup>4</sup>Department of Innovative Medical Sciences, Seoul National University Graduate School, Seoul 03080, Republic of Korea, <sup>5</sup>Health Promotion Center, Seoul National University Hospital, Seoul 03080, Republic of Korea*

\*Heng Piao and Belong Cho are co-corresponding authors.

## Correspondence to:

Belong Cho, MD, PhD

Department of Family Medicine, Seoul National University Hospital, Seoul National University College of Medicine, Seoul 03080, Republic of Korea

Tel: 82-2-2072-2195, 82-10-9865-2195

NOTE: This preprint reports new research that has not been certified by peer review and should not be used to guide clinical practice.

E-mail: belong@snu.ac.kr

Heng Piao, MD, PhD

Department of Cancer Epidemiology and Prevention, Henan Cancer Hospital, Affiliate Cancer

Hospital of Zhengzhou University, Zhengzhou 450003, China

Email: jlpmh505@snu.ac.kr

# ABSTRACT

**OBJECTIVES** To investigate and compare non-communicable disease (NCD) risk factors among Asian migrants in Korea, the Korean population, and the general population of their respective home countries.

**DESIGN** A cross-sectional (2015) and longitudinal (2009–2015) observational study.

**SETTING** Population-wide analysis using the National Health Information Database of the Korean National Health Insurance Service for 2009–2015.

**PARTICIPANTS** Asian migrants (n=987,214) in Korea and Korean nationals (n=1,693,281) aged  $\geq 20$  years.

**MAIN OUTCOME MEASURES** Prevalence of NCD risk factors such as current smoking, physical inactivity, obesity, diabetes, hypertension, and hypercholesterolemia in 2015. Secondary outcomes were the incidence of type 2 diabetes and hypertension from 2010 to 2015.

**RESULTS** Among participants aged  $\geq 20$  years, the age-adjusted prevalence of obesity was higher in Chinese, Filipino, and other Asian migrant women (25.6%, 30.9%, and 35.5%, respectively) than in Korean women (23.2%) ( $P < 0.001$ ,  $P = 0.002$ ,  $P < 0.001$ , respectively). Among participants aged 20–49 years, the age-adjusted prevalence of diabetes was higher in Filipino migrant women than in Korean women (2.6% and 1.8%, respectively;  $P = 0.009$ ). The age-adjusted prevalence of hypertension was higher in Filipino migrant women than in Korean women (7.7% and 4.2%, respectively;  $P < 0.001$ ). In multivariate analyses, the odds ratio (OR) of developing type 2 diabetes was 1.32 (95% CI; 1.11 to 1.57) among Vietnamese migrant men compared with that among Korean men aged 20–39 years. The ORs of developing hypertension were 1.49 (95% CI; 1.05 to 2.11) and 2.22 (95% CI; 1.17 to 4.19) among Filipino migrant women compared with that among Korean women aged 20–39 years and more than 40 years, respectively.

**CONCLUSIONS** The identified relationships between Asian migrant nationality and NCD risk factors provide basic evidence for targeting high-risk groups and improving policy development in Korea.

## SUMMARY BOX

### WHAT IS ALREADY KNOWN ON THIS TOPIC

- According to the healthy migrant effect, international migrants—particularly recent migrants—are healthier than the general population of the host country.
- Jewish migrants to Israel have health disadvantages compared with Israeli natives.
- Whether a health advantage exists regarding non-communicable disease risk factors among international migrants, targeting those born in Asian countries and moving to another high-income Asian country such as the Republic of Korea, is unclear.

### WHAT THIS STUDY ADDS

- In 2015, among participants aged  $\geq 20$  years, the age-adjusted prevalence of current smoking among Chinese men and other Asian migrant women was higher than that among Korean men and women; the age-adjusted prevalence of obesity among Chinese, Filipino, and other Asian migrant women was higher than that among Korean women.
- During 2010–2015, in multivariate analyses, after adjusting for covariates, among participants aged 20–39 years, Vietnamese migrant men were more likely to have type 2 diabetes than Korean men; among participants aged  $\geq 20$  years, Filipino migrant women were more likely to have hypertension than Korean women.
- The pursuit of better economic, educational, or even social and living environmental needs, combined with the self-selection of migrants as well as the immigration policy of the Korean government may explain the healthy migration advantage concerning diabetes and hypertension among the majority of Asian migrants in Korea.

## Introduction

Recent systematic reviews and meta-analyses of migrant health have supported the healthy migration hypothesis—that international migrants have health advantages.<sup>1-2</sup> This healthy migration effect suggests that international, and particularly new, migrants are healthier than the overall population of the host country.<sup>2-4</sup> The healthy migration effect can either be attributed to self-selection or immigration policies;<sup>3-6</sup> nevertheless, the healthy migrant effect is inversely associated with the duration of residence in the host country.<sup>2-8</sup> Moreover, among international migrants in Europe, North America, and Australia, non-communicable diseases (NCDs)—such as cardiovascular disease and cancer—may vary, based on the country of origin and destination, and with the length of stay in the host country.<sup>9-10</sup> However, in Israel, a sick migration effect is shown among international migrants within the initial 20 years of residence since commencement, implying that international migrants have health disadvantages, compared with the native population in the host country.<sup>11</sup>

Among East Asians, a high body mass index (BMI) correlated with an excess risk of death due to cardiovascular disease, cancer, and other causes; conversely, Indians and Bangladeshis with a high BMI did not show the same correlation.<sup>12</sup> Moreover, the South Asian migrant population shows an excess risk of developing diabetes compared with the European population, but onset is still 5-10 years earlier at lower BMIs.<sup>13</sup> Moreover, South Asians are more likely to have diabetes and cardiovascular disease than other ethnic groups, under the influence of the socioeconomic situation, region of residence, and migration.<sup>14</sup> In the Republic of Korea, the association between BMI and risk of death varies, according to age, sex, smoking history, and cause of death; a BMI of  $\geq 25$  can increase mortality risk among Koreans.<sup>15</sup> Compared with Korean natives, the prevalence of obesity in Asian migrants showed increasing trends; compared to Korean native women, the prevalence of obesity is becoming higher in Asian migrant women since 2014.<sup>16-17</sup> However, the prevalence of diabetes of Asian migrants showed stable trends; even the prevalence of hypertension of Asian migrants showed a sex-specific decreasing trend from 2009 to 2015.<sup>16</sup>

The state of health of international migrants is needed to assess and manage from a global

perspective and to coordinate among core health sectors of nation-states.<sup>18</sup> However, so far, few previous studies have involved international migrants moving within- and between-Asian countries, especially those who were born in Asian countries and moving to another high-income East Asian country. Moreover, worldwide, there are scarce studies on international migration to validate and interpret the healthy migration effect, using high-quality health check-up data from the National Health Insurance Service (NHIS), which also include lifestyle factors in the same research setting. Furthermore, it is unclear whether a health advantage of NCD risk factors such as obesity, diabetes, and hypertension exists among Asian migrants of different nationalities in Korea. Moreover, it is not clear how the development of type 2 diabetes (T2D) and hypertension is changing according to nationality. This study aimed to investigate differences in the prevalence of NCD risk factors between Asian migrants of different nationalities and the Korean population, to evaluate whether there is a healthy migration effect in Korea. Second, we examined differences in the development of T2D and hypertension between Asian migrants and the Korean population, using nationwide data. Finally, we investigated differences in obesity, diabetes, and elevated blood pressure among Chinese, Filipino, and Vietnamese migrants in Korea, as compared with the general population of their home countries. We hypothesized that Asian migrants of different nationalities have a greater health advantage regarding NCD risk factors than Koreans, based on our previous study.<sup>16</sup>

## Methods

### Study population

We conducted a retrospective population-based analysis of data collected during a longitudinal study. The study population constituted Asian migrants and the general Korean population aged  $\geq 20$  years who underwent health check-ups during 2009–2015 using the National Health Information Database (NHID) established by the Korean NHIS.<sup>16 19</sup> The NHID included eligibility data, National Health check-up data, healthcare utilization, long-term care insurance, and health care provider information.<sup>19</sup> Namely, concerning the eligibility database, the information of income-based insurance contributions,

demographic variables, and date of death were included.<sup>19</sup> Moreover, the NHID is suitable for population-based studies aimed at primary and secondary prevention of chronic diseases, including diabetes and hypertension.<sup>19-22</sup> The health check-up data for Asian migrants could be extracted from customized NHID data and represented the majority of Asian migrants who underwent annual voluntary health check-ups in Korea.<sup>16 19</sup> Moreover, the health check-up data of the Korean population were obtained from the 1 million-sample cohort of the NHID, which is a random sample representing 2.2% of the Korean-born population, representative of the nationwide population of Korea.<sup>16 23</sup> Notably, considering that the NHID is more extensive than it seems, the NHIS conducted systematic stratified random sampling with 2.2% within each stratum for the construction of the 1 million-sample cohort, of which the target variable for sampling was the individual's total annual medical expenses.<sup>23</sup> Among 2,691,010 participants aged  $\geq 20$  years who underwent health check-ups during 2009–2015, we excluded 350 lacking information on blood pressure and fasting blood glucose and total cholesterol levels. Furthermore, 10,165 individuals with missing information on smoking status, alcohol use, and physical activity were excluded. Finally, the study population of 2,680,495 participants included 987,214 Asian migrants and 1,693,281 Korean nationals.<sup>16</sup> From 2009 to 2015, the numbers of Asian migrants by year were 93,845, 113,414, 129,827, 132,226, 142,275, 175,082, and 200,545, respectively. Similarly, the numbers of Koreans by year were 208,772, 231,881, 236,751, 244,443, 243,592, 261,680, and 266,162, respectively.<sup>16</sup> After excluding participants with diabetes and hypertension at the first health check-up (2009–2014), the numbers of participants who underwent health check-ups more than once, with information on the presence or absence of diabetes and hypertension at the last health check-up, were 505,342 and 431,433, respectively. The numbers of participants newly diagnosed with T2D and hypertension between the first and last health check-up were 22,284 and 48,007, respectively.<sup>17</sup>

Here, Asian migrants originated from China, Japan, Vietnam, the Philippines, Indonesia, Thailand, Uzbekistan, Sri Lanka, Mongolia, Bangladesh, Pakistan, and India. For the study, Asian migrants were divided into Chinese, Japanese, Filipino, Vietnamese, and other Asian migrants to ensure sufficient samples after age standardization in 2015. Moreover, for the accuracy of age standardization, migrants from Thailand, Uzbekistan, Sri Lanka, Mongolia, Bangladesh, Pakistan, Indonesia, and India were

labelled “other Asian migrants” when the data were derived from the NHIS. For example, there were not enough samples for several positive indicators of NCD risk factors among Indonesian migrants aged  $\geq 60$  years. Therefore, migrants from Thailand, Uzbekistan, Sri Lanka, Mongolia, Bangladesh, Pakistan, Indonesia, and India were combined as “other Asian migrants” collectively, as age standardization resulted in insufficient data on specific positive outcome indicators.<sup>17</sup> Furthermore, regarding nationality, there were insufficient samples among Asian migrants aged 60–69, 70–79, and 80+ years for age standardization by sex for several positive indicators of NCD risk factors, especially in Filipino, Vietnamese, and other Asian migrants. Therefore, the study population was divided into age groups of 20–29, 30–39, 40–49, 50–59, and 60+ years to conduct age standardization for NCD risk factors among Asian migrants, according to nationality, compared with Koreans.

The Institutional Review Board of Seoul National University Hospital approved the study on August 21, 2018 (IRB number: E-1808-093-966). Moreover, per IRB criteria, the need for obtaining informed participant consent was waived in our study.

### **Patient and Public Involvement**

Patients or the public were not involved in the design, or conduct, or reporting, or dissemination plans of our research.

### **Measurements**

Age, sex, and monthly insurance premiums are included in the data collected by the NHIS, and insurance premiums are determined by income level in Korea.<sup>16 22</sup> In our study, monthly insurance premiums were used to indicate economic status (first, second, third, and fourth quartiles), which was regarded as a vital statistic that represented income level (low, middle-low, high-middle, and high, respectively). The health check-up participation data were obtained from the NHIS health check-up database. According to the information obtained from the health questionnaires, smoking status was categorized as non-smoking, ex-smoking, or current smoking; any alcohol use was defined as alcohol consumption  $\geq 1$  time/week; participants were categorized as physically active (physical activity  $\geq 3$  times/week) or inactive (physical activity  $< 3$  times/week). Measurements of weight, height, and blood



pressure were included in the physical examinations, and the body mass index (BMI) was calculated as the weight (kg) divided by the height (m<sup>2</sup>). Obesity was defined as a BMI  $\geq 25$  kg/m<sup>2</sup>. Elevated blood pressure (hypertension) was defined as blood pressure  $\geq 140/90$  mmHg, diagnosis of hypertension, or prescription of antihypertensive drugs in the health questionnaires. Furthermore, total cholesterol and fasting blood glucose were included in the laboratory tests. Hypercholesterolemia was defined as a total cholesterol level  $\geq 240$  mg/dL. Diabetes was defined as a fasting blood glucose level  $\geq 126$  mg/dL, previous diabetes diagnosis, or prescription of antidiabetic drugs in the health questionnaires.<sup>17</sup>

The primary study outcome was the prevalence of NCD risk factors such as current smoking, physical inactivity, obesity, diabetes, hypertension, and hypercholesterolemia in 2015.<sup>24-28</sup> The secondary study outcomes were the incidence of T2D and hypertension from 2010 to 2015. We excluded participants with diabetes and hypertension at the first health check-up to ascertain incident T2D and hypertension from 2009 to 2014. Incident T2D and hypertension were determined for each participant between the first and last health check-ups.<sup>17</sup>

## Statistical analysis

We conducted several sets of analyses. The research design used and the statistical analyses performed for this and previous studies are shown in Supplementary Figure A1. Prevalence was defined as the number of participants with cases in a given year per number of participants in the population who underwent a health check-up during this period. Incidence was defined as the number of participants with new cases during the specified period per number of participants in the population who underwent health check-ups more than once during this period. First, the age-adjusted prevalence of lifestyle, socioeconomic, and health-related factors among Asian migrants and the native population according to nationality was calculated. The age-adjusted prevalence was calculated separately by sex using direct age standardization. Regarding the age-adjusted prevalence of lifestyle, socioeconomic, and health-related factors among Chinese, Japanese, Filipino, Vietnamese, and other Asian migrants compared with Koreans, age standardization was conducted using 10-year age bands, in which the world standard

population was used as the standard population.<sup>29</sup> However, to compare the age-adjusted prevalence of diabetes among Japanese migrants with that of Koreans, we selected Japanese migrant and Korean populations aged  $\geq 30$  years, as there were insufficient samples among Japanese migrants aged 20–29 years for age standardization in diabetes. Moreover, we selected the Filipino and Vietnamese population, comparing with Koreans aged 20–59 years for age standardization for current smoking because there were insufficient samples in this category among Filipino and Vietnamese migrants aged  $\geq 60$  years. Furthermore, considering the limitation of overall insufficient samples among Asian migrants of different nationalities aged 50–59, 60–69, 70–79, and 80+ years, we calculated the age-specific and age-adjusted prevalence of lifestyle, socioeconomic, and health-related factors among Chinese, Filipino, Vietnamese, and other Asian migrants compared with Koreans, separately by sex, using 10-year age bands for the ages 20–49 years. Therefore, we conducted direct age standardization in migrants aged 20–29, 30–39, and 40–49 years, in which the world standard population was used as the standard population.<sup>29</sup> Regarding direct age standardization for the ages 20–49 years, Japanese migrants aged 20–29 years were excluded owing to insufficient data. For these analyses, we also examined age-adjusted prevalence ratios (aPRs) and 95% log-normal confidence intervals (CIs).<sup>30</sup>

Second, to examine the differences in the development of T2D and hypertension between Asian migrants according to nationality and the native Korean population, multivariable logistic regression analyses were conducted and adjusted for the following covariates: age (continuous, years), sex, economic status, BMI (continuous,  $\text{kg/m}^2$ ), smoking status, alcohol use, and physical activity. For these analyses, adjusted odds ratios (aORs) and 95% CIs of incident T2D and hypertension determinants were examined between the first and last health check-ups. Further, we conducted multivariable logistic regression analyses stratified by age (20–39 and  $\geq 40$  years) and sex.<sup>17</sup>

Finally, we examined differences in the age-adjusted prevalence of obesity, elevated blood pressure, and diabetes among Chinese, Filipino, and Vietnamese migrants, compared with the general population of their respective home countries.<sup>17</sup> Age standardization was conducted using 10-year age bands, and the world standard population was used as the standard population.<sup>29</sup> However, Japanese migrants were excluded because of insufficient data in Japanese migrants aged 20–29 years. Health data among general

populations in China, the Philippines, and Vietnam were obtained from the Global Health Observatory data repository of the World Health Organization. Data are available from <http://apps.who.int/gho/data/node.main.A867?lang=en/>, which is of same year for comparison with Asian migrants, according to nationalities.

All analyses were performed using SAS version 9.3 (SAS Institute Inc., Cary, NC, USA), and a  $P$  value  $<0.05$  was considered statistically significant.

## Results

Table 1 shows the characteristics of Asian migrants of different nationalities and Koreans in 2015. The mean (SD) age among Korean natives and Chinese, Japanese, Filipino, Vietnamese, and other Asian migrants was 49.4 (14.0), 46.4 (11.4), 47.4 (9.2), 32.5 (6.0), 30.3 (9.2), 30.3 (6.3) years, respectively, in 2015. The number of women among Korean natives and Chinese, Japanese, Filipino, Vietnamese, and other Asian migrants was 124,850 (46.9%), 47,808 (47.2%), 3,171 (71.3%), 2,347 (19.7%), 5,600 (29.1%) years, respectively.

In 2015, the age-adjusted prevalence of current smoking was higher in Chinese migrant men (52.8%) than in Korean men (39.9%) ( $P < 0.001$ ; Table 2A). Moreover, the age-adjusted prevalence of current smoking was higher in other Asian migrant women (6.4%) than in Korean women (3.8%) ( $P < 0.001$ ; Table 2B). The age-adjusted prevalence of obesity in Chinese migrant women (25.6%), in Filipino migrant women (30.9%), and other Asian migrant women (35.5%) was higher than that in Korean women (23.2%) ( $P < 0.001$ ,  $P = 0.002$ ,  $P < 0.001$ , respectively; Table 2B). Additionally, the age-adjusted prevalence of hypercholesterolemia in Japanese and Vietnamese migrant men (14.4% and 12.9%, respectively) was higher than that in Korean men (10.2%) ( $P = 0.004$ ,  $P = 0.016$ , respectively; Table 2A). Furthermore, the age-adjusted prevalence of hypercholesterolemia in Japanese migrant women (13.8%), and Vietnamese migrant women (12.9%) was higher than that in Korean women (9.5%) ( $P < 0.001$ ,  $P < 0.001$ , respectively; Table 2B).

In 2015, among participants aged 30–39 years, the prevalence of diabetes in Chinese migrant men (4.1%) was higher than that in Korean men (3.5%) (PR, 1.20; 95% CI, 1.07 to 1.33). Among participants aged 40–49 years old, the prevalence of obesity in Chinese migrant women (27.5%) was higher than that in Korean women (23.5%) (PR, 1.17; 95% CI, 1.13 to 1.22). In addition, among participants aged 40–49 years old, the prevalence of hypertension in Chinese migrant women (10.7%) was higher than that in Korean women (9.7%) (PR, 1.10; 95% CI, 1.04 to 1.17) (Supplementary Tables A1 and A2).

Among participants aged 20–29 years, the prevalence of hypercholesterolemia in Filipino migrant men (7.4%) was higher than that in Korean men (5.4%) (PR, 1.37; 95% CI, 1.18 to 1.61). Moreover, among participants aged 30–39 years, the prevalence of hypercholesterolemia in Filipino migrant men (12.7%) was higher than that in Korean men (11.8%) (PR, 1.09; 95% CI, 1.00 to 1.18). Among participants aged 30–39 years, the prevalence of diabetes in Filipino migrant women (3.1%) was higher than that in Korean women (1.5%) (PR, 2.08; 95% CI, 1.47 to 2.94) (Supplementary Tables A3 and A4).

In 2015, among participants aged 20–49 years old, the age-adjusted prevalence of hypercholesterolemia in Filipino migrant men (11.7%) was higher than that in Korean men (10.3%) ( $P=0.010$ ). The age-adjusted prevalence of obesity in Filipino migrant women (25.7%) was higher than that in Korean women (16.9%) ( $P<0.001$ ). The age-adjusted prevalence of diabetes in Filipino migrant women (2.6%) was higher than that in Korean women (1.8%) (aPR, 1.49; 95% CI, 1.11 to 2.02;  $P=0.009$ ). The age-adjusted prevalence of hypertension in Filipino migrant women (7.7%) was higher than that in Korean women (4.2%) (aPR, 1.81; 95% CI, 1.48 to 2.21;  $P<0.001$ ) (Figure 1 and Supplementary Table B).

During 2010–2015, the number of participants who underwent health check-ups more than once and had information on diabetes was 505,342. The number of participants with incident T2D between the first and last health check-ups was 22,284. In multivariate analyses, compared with the native Korean population, the OR for developing T2D after adjusting for covariates was 0.82 (95% CI, 0.78 to 0.86) among Asian migrants. However, among Vietnamese migrant men aged 20–39 years, the OR for developing T2D was 1.32 (95% CI, 1.11–1.57), as compared with Korean men (Figure 2).

During 2010-2015, the number of participants who underwent health check-ups more than once and for whom data regarding hypertension was available was 431,433; the number of participants with hypertension between the first and last health check-ups was 48,007. In multivariate analyses, compared with the native Korean population, the OR for developing hypertension after adjusting for covariates was 0.77 (95% CI, 0.75 to 0.79) among Asian migrants. However, compared with Korean women, the ORs of developing hypertension were 1.49 (95% CI, 1.05 to 2.11) and 2.22 (95% CI, 1.17 to 4.19) among Filipino migrant women aged 20–39 years and those aged >40 years, respectively (Figure 3).

Compared to the general population in their home countries, we found that most Asian migrants in Korea were healthier in terms of the prevalence of obesity, diabetes, and elevated blood pressure. However, the age-adjusted prevalence of obesity (41.4%) in Filipino migrant men was higher than that in men from the general population in the Philippines (30.4%) in 2015. Moreover, in 2014, the age-adjusted prevalence of diabetes (12.5%) among Filipino migrant men was higher than that among the men in the Philippines (7.1%) (Figure 4B).

**Table 1.** Characteristics of Asian migrant and Koreans aged 20 years and older who underwent health check-ups, according to nationalities in 2015\*

| Variable                             | Native       | Migrant      |              |              |              |              |
|--------------------------------------|--------------|--------------|--------------|--------------|--------------|--------------|
|                                      | Korean       | Chinese      | Japanese     | Filipino     | Vietnamese   | Other Asian  |
| N                                    | 266,162      | 101,223      | 4,445        | 11,888       | 19,224       | 63,765       |
| Age (years)                          | 49.4 ± 14.0  | 46.4 ± 11.4  | 47.4 ± 9.2   | 32.5 ± 6.0   | 30.3 ± 9.2   | 30.3 ± 6.3   |
| Sex (%)                              |              |              |              |              |              |              |
| Men                                  | 53.1         | 52.8         | 28.7         | 80.3         | 70.9         | 92.7         |
| Women                                | 46.9         | 47.2         | 71.3         | 19.7         | 29.1         | 7.3          |
| Economic status (%)                  |              |              |              |              |              |              |
| 1st quartile (low)                   | 15.5         | 23.4         | 24.5         | 34.9         | 27.4         | 28.0         |
| 2nd quartile                         | 25.0         | 45.1         | 19.2         | 53.2         | 53.1         | 57.5         |
| 3rd quartile                         | 21.3         | 27.9         | 25.3         | 10.6         | 18.0         | 12.9         |
| 4th quartile (high)                  | 38.2         | 3.6          | 31.0         | 1.3          | 1.5          | 1.6          |
| Body mass index (kg/m <sup>2</sup> ) | 24.0 ± 3.4   | 23.7 ± 3.3   | 23.2 ± 3.6   | 24.1 ± 3.1   | 21.8 ± 2.4   | 23.3 ± 3.2   |
| Systolic blood pressure (mm Hg)      | 122.1 ± 14.5 | 121.6 ± 14.8 | 117.6 ± 14.3 | 121.2 ± 12.8 | 115.7 ± 12.0 | 118.8 ± 12.0 |
| Fasting serum glucose (mg/dl)        | 99.8 ± 24.2  | 97.7 ± 21.9  | 95.4 ± 19.1  | 94.5 ± 18.6  | 90.3 ± 14.9  | 91.4 ± 16.8  |
| Total serum cholesterol (mg/dl)      | 195.3 ± 38.9 | 190.4 ± 38.0 | 205.4 ± 38.2 | 192.0 ± 37.6 | 182.8 ± 37.5 | 185.0 ± 37.5 |
| Smoking status (%)                   |              |              |              |              |              |              |
| Ex-smoking                           | 18.0         | 10.7         | 10.6         | 4.2          | 4.1          | 4.1          |
| Current smoking                      | 21.5         | 28.7         | 9.5          | 19.8         | 20.1         | 30.9         |
| Any alcohol use (%)                  | 50.1         | 46.2         | 30.5         | 46.4         | 39.9         | 37.9         |
| Physical activity (%)                | 70.2         | 51.6         | 64.4         | 49.9         | 49.1         | 45.4         |

\*Data are expressed as the means ± SD, or %.

**Table 2A.** Comparison of the age-adjusted prevalence of lifestyle, socioeconomic, and health-related factors between Asian migrant men of different nationalities and Korean men aged 20–49 years who underwent health check-ups in 2015

| Variable                        | Age-adjusted prevalence (95% CI)* |                  |                     |                  |                  |                  |                |                      |
|---------------------------------|-----------------------------------|------------------|---------------------|------------------|------------------|------------------|----------------|----------------------|
| Men                             | Current smoking                   | Any alcohol use  | Physical inactivity | Low-income level | Obesity          | Hypertension     | Diabetes       | Hypercholesterolemia |
| Korean                          | 39.9 (39.5–40.3)                  | 70.3 (69.8–70.9) | 24.8 (24.5–25.1)    | 10.9 (10.7–11.1) | 41.7 (41.3–42.1) | 22.4 (22.2–22.7) | 9.6 (9.5–9.8)  | 10.2 (10.0–10.4)     |
| Asian migrant                   |                                   |                  |                     |                  |                  |                  |                |                      |
| Chinese                         | 52.8 (52.1–53.6)                  | 68.6 (67.8–69.4) | 45.8 (45.1–46.4)    | 19.6 (19.2–20.1) | 35.6 (35.0–36.2) | 20.4 (20.0–20.8) | 7.4 (7.2–7.7)  | 7.6 (7.4–7.9)        |
| <i>P</i> -value for difference† | < 0.001                           | < 0.001          | < 0.001             | < 0.001          | < 0.001          | < 0.001          | < 0.001        | < 0.001              |
| Japanese‡                       | 26.8 (22.1–31.5)                  | 70.4 (63.3–77.5) | 27.8 (23.4–32.3)    | 10.4 (6.7–14.0)  | 37.9 (32.5–43.3) | 18.3 (15.7–20.9) | 8.0 (6.3–9.7)  | 14.4 (11.6–17.1)     |
| <i>P</i> -value for difference† | < 0.001                           | 0.990            | 0.161               | 0.778            | 0.187            | 0.006            | < 0.001        | 0.004                |
| Filipino§                       | 23.0 (20.0–26.0)                  | 49.6 (40.1–59.1) | 52.9 (49.4–56.5)    | 28.6 (20.9–36.2) | 41.4 (31.9–51.0) | 20.8 (10.3–31.3) | 8.9 (3.2–14.5) | 11.2 (5.9–16.5)      |
| <i>P</i> -value for difference† | < 0.001                           | < 0.001          | < 0.001             | < 0.001          | 0.958            | 0.772            | 0.804          | 0.695                |
| Vietnamese§                     | 33.2 (30.8–35.5)                  | 51.0 (47.0–54.9) | 51.5 (47.1–55.9)    | 21.7 (18.8–24.7) | 13.5 (11.3–15.6) | 9.2 (6.7–11.6)   | 3.4 (2.1–4.8)  | 12.9 (10.4–15.4)     |
| <i>P</i> -value for difference† | < 0.001                           | < 0.001          | < 0.001             | < 0.001          | < 0.001          | < 0.001          | < 0.001        | 0.016                |
| Other Asian                     | 35.8 (31.6–39.2)                  | 45.4 (41.4–49.4) | 52.9 (49.4–56.5)    | 24.0 (21.7–26.3) | 38.3 (34.6–42.1) | 18.4 (14.9–22.0) | 5.1 (3.8–6.5)  | 9.9 (8.4–11.4)       |
| <i>P</i> -value for difference† | 0.026                             | < 0.001          | < 0.001             | < 0.001          | 0.092            | 0.046            | < 0.001        | 0.709                |

\*Data are expressed as %; age standardization with 10-year age bands; the world standard population was used as the standard population; CI, confidence interval.

†*P*-value for the difference was calculated among Asian migrant men compared with Korean men, according to nationality.

‡The age-adjusted prevalence of diabetes (95% CI) between Japanese migrant and Korean men aged ≥30 years were 8.0 (6.3–9.7) and 12.3 (12.1–12.5), respectively.

§The age-adjusted prevalence of current smoking (95% CI) among Filipino migrant, Vietnamese migrant, and Korean men aged 20–59 years were 23.0 (20.0–26.0), 33.2 (30.8–35.5), and 44.2 (43.7–44.7), respectively.

**Table 2B.** Comparison of the age-adjusted prevalence of lifestyle, socioeconomic, and health-related factors between Asian migrant women of different nationalities and Korean women aged 20–49 years who underwent health check-ups in 2015

| Variable                        | Age-adjusted prevalence (95% CI)* |                  |                     |                  |                  |                  |               |                      |
|---------------------------------|-----------------------------------|------------------|---------------------|------------------|------------------|------------------|---------------|----------------------|
| Women                           | Current smoking                   | Any alcohol use  | Physical inactivity | Low-income level | Obesity          | Hypertension     | Diabetes      | Hypercholesterolemia |
| Korean                          | 3.8 (3.7–4.0)                     | 37.7 (37.3–38.2) | 32.0 (31.6–32.3)    | 19.2 (19.0–19.5) | 23.2 (22.9–23.4) | 16.0 (15.8–16.2) | 5.9 (5.8–6.0) | 9.5 (9.3–9.7)        |
| Asian migrant                   |                                   |                  |                     |                  |                  |                  |               |                      |
| Chinese                         | 2.9 (2.7–3.1)                     | 23.4 (22.8–24.0) | 46.5 (45.8–47.3)    | 29.6 (29.0–30.2) | 25.6 (25.1–26.1) | 14.6 (14.2–14.9) | 4.4 (4.2–4.6) | 8.3 (8.1–8.6)        |
| <i>P</i> -value for difference† | < 0.001                           | < 0.001          | < 0.001             | < 0.001          | < 0.001          | < 0.001          | < 0.001       | < 0.001              |
| Japanese‡                       | 4.7 (3.2–6.2)                     | 28.9 (24.6–33.3) | 34.5 (31.1–37.9)    | 22.8 (20.4–25.2) | 18.3 (16.0–20.6) | 13.2 (11.2–15.2) | 5.6 (4.0–7.2) | 13.8 (12.0–15.7)     |
| <i>P</i> -value for difference† | 0.207                             | < 0.001          | 0.140               | 0.002            | < 0.001          | 0.012            | 0.040         | < 0.001              |
| Filipino§                       | 2.0 (1.3–2.7)                     | 11.9 (8.8–15.0)  | 51.6 (44.9–58.4)    | 42.0 (36.9–47.0) | 30.9 (25.2–36.6) | 19.1 (13.2–24.9) | 5.2 (2.2–8.2) | 11.2 (6.9–15.6)      |
| <i>P</i> -value for difference† | < 0.001                           | < 0.001          | < 0.001             | < 0.001          | 0.002            | 0.266            | 0.672         | 0.398                |
| Vietnamese§                     | 2.2 (1.1–3.2)                     | 5.0 (4.2–5.7)    | 56.4 (52.9–59.8)    | 38.5 (35.9–41.1) | 12.7 (10.8–14.6) | 10.7 (8.4–13.0)  | 5.6 (3.9–7.3) | 12.9 (10.6–15.2)     |
| <i>P</i> -value for difference† | 0.004                             | < 0.001          | < 0.001             | < 0.001          | < 0.001          | < 0.001          | 0.764         | < 0.001              |
| Other Asian                     | 6.4 (4.8–7.9)                     | 12.8 (11.1–14.5) | 53.2 (49.4–57.1)    | 36.3 (33.3–39.3) | 35.5 (31.4–39.5) | 16.1 (12.7–19.6) | 6.0 (3.8–8.1) | 11.4 (9.0–13.9)      |
| <i>P</i> -value for difference† | < 0.001                           | < 0.001          | < 0.001             | < 0.001          | < 0.001          | 0.949            | 0.961         | 0.094                |

\*Data are expressed as %; age standardization with 10-year age bands; the world standard population was used as the standard population; CI, confidence interval.

†*P*-value for difference was calculated among Asian migrant women compared with Korean women, according to nationality.

‡The age-adjusted prevalence of diabetes (95% CI) between Japanese migrant and Korean women aged ≥30 years were 5.6 (4.0–7.2) and 7.6 (7.5–7.8), respectively.

§The age-adjusted prevalence of current smoking (95% CI) among Filipino migrant, Vietnamese migrant, and Korean women aged 20–59 years were 2.0 (1.3–2.7), 2.2 (1.1–3.2), and 4.4 (4.2–4.5), respectively.



# Discussion

## Principal findings

The results of this study suggested that Chinese and Japanese migrants had an overall health advantage regarding diabetes and hypertension, in 2015. However, this health advantage could not apply to Filipino, Vietnamese, and other Asian migrants, particularly women. Specifically, among participants aged 30–39 years, Chinese migrant men had a higher prevalence of diabetes than Korean men. Moreover, among participants aged 40–49 years, Chinese migrant women had a higher prevalence of hypertension than Korean women. Among Filipino migrants aged 20–49 years, the age-adjusted prevalence of diabetes and hypertension was higher in Filipino migrant women than in Korean women in 2015. During 2010–2015, in the multivariate analyses, among participants aged 20–39 years, Vietnamese migrant men were more likely to have T2D than Korean men. Among participants aged  $\geq 20$  years, a covariate-adjusted analysis indicated that Filipino migrant women were more likely to develop hypertension than Korean women. We found that the prevalence of obesity, diabetes, and elevated blood pressure was lower among most Asian migrants in Korea than among the general population in the migrants' respective home countries. However, the prevalence of obesity and diabetes in Filipino migrant men was higher than that in men from the Philippine general population.

## Strengths and weaknesses of the study

Our study had several strengths. This was a large-scale observational study comparing the prevalence of NCD risk factors among Asian migrants of different nationalities and their host population in Asia, of which the design was cross-sectional in 2015 and longitudinal during 2009–2015. Thus far, few similar previous studies investigated the healthy migrant effect among international migrant populations of various ethnic groups within the host populations of high-income countries in Asia, using big data coming from the same source, and including lifestyle factors. Second, longitudinal data were collected

to examine differences in newly diagnosed T2D and hypertension between Asian migrants according to nationality and Koreans in the same dataset setting. Regarding longitudinal analysis, a recent review study has addressed the importance of answering research questions on migrant health, using longitudinal data.<sup>31</sup> However, due to lack of complete and standardized worldwide migrant data, even a global-scale study that verifies the healthy migrant effects in high-income countries could only be conducted by pooling mortality data and considering heterogeneity—of which the high-quality data were from different sources or sectors—and did not include international migrants in Asia.<sup>1</sup> Moreover, differences in obesity, diabetes, and elevated blood pressure were investigated between various Asian migrants and the general populations in their home countries using direct standardization according to the world standard population. Therefore, the innovative point in this study is that, while comparing Asian migrants with Korean natives regarding health, using health check-up data of the Korean National Health Insurance Service, we conducted age standardization by the world standard population and compared the health of Asian migrants with the health data in their home countries, targeting the general populations in China, Philippines, and Vietnam, published by the Global Health Observatory data repository of the World Health Organization.<sup>29</sup>

Our study also had several limitations. First, the total numbers of diabetes and hypertension cases were underestimated because we only selected individuals who had national health insurance and underwent health check-ups. Further, the study population could have been healthier than the population as a whole if the individuals were more attentive to their health and fully used medical resources. However, a previous study using the same data (from 2009 to 2015) showed that the prevalence of diabetes in Korean men and women aged  $\geq 20$  years showed an increasing trend, in line with the results of a recent study on Korean adults aged  $\geq 30$  years based on the Korean National Health and Nutrition Examination Survey.<sup>16 17 32</sup> Among Korean men and women aged  $\geq 30$  years, the prevalence of diabetes in the NHID health check-up database in 2015 was 12.3% and 7.6%, respectively, similar to the prevalence of diabetes determined using data from the Korean National Health and Nutrition Examination Survey of 2009–2013 (11.4% and 8.7%, respectively).<sup>16 17 32</sup> Moreover, the prevalence of diabetes and hypertension is more likely to have been underestimated in Asian migrants than in

Koreans.<sup>16</sup> For example, in Singapore, although international migrant workers have national health insurance when employed, they may not utilize necessary health services or even know that they have been covered.<sup>33</sup> Second, we did not adjust for family history, nutritional factors, stress, and depression in the statistical analysis of the relationship between Asian migrants according to nationality and newly diagnosed T2D or hypertension as compared with Koreans. Third, because of the limited use of data on the type of international migrant—namely, migrant workers, students, and marriage migrants—migrant status factors were not considered; however, we used economic status instead of migrant status to compensate.<sup>16</sup> Fourth, we could not distinguish between essential and secondary hypertensive participants in our study. However, secondary hypertension is only expected in 5%–10% of participants with hypertension, which may not affect our research conclusion.<sup>34–36</sup> Fifth, there are insufficient samples among Japanese, Filipino, and Vietnamese migrants, regarding several non-communicable risk factors of a specific age group. Nevertheless, we overcame these limitations by using cross-sectional and longitudinal study designs, based on age, sex, and the socioeconomic status of Asian migrants of different nationalities in Korea. Finally, we were unaware of their residence duration and could not calculate the exact follow-up time of incident T2D and hypertension, as there was a multitude of combinations between first and last health check-ups. Even when using the Kaplan-Meier method with the follow-up time, it was impossible to accurately compare changes in diabetes and hypertension over time in multiple populations of different nationalities for 2010–2015. This results from differences in countries of birth, early and lifestyle factors, and cultural backgrounds between Asian migrants and Korean natives. However, we performed an annual trend analysis for lifestyle, socioeconomic, and health-related factors among Asian migrants and Koreans from 2009 to 2015 in our previous study.<sup>16</sup> These trend analyses provide insight into changes in the overall prevalence of obesity, diabetes, and hypertension among Asian migrants compared with Koreans over time.

### **Comparison with previous studies**

In our study, the age-adjusted prevalence rates of current smoking were higher in Chinese migrant men

than in Korean men; the age-adjusted prevalence of current smoking was higher in other Asian migrant women than in Korean women among participants aged  $\geq 20$  years in 2015. Moreover, the prevalence of smoking among migrants is changing according to the situation of the home and host countries.<sup>31 37</sup>

<sup>38</sup> Furthermore, smoking is harmful to the health of both the migrant and native populations, and risk factors attributed to social inequality can contribute to more than half of the major NCDs, especially for cardiovascular disease and lung cancer.<sup>11 24 39</sup> Considering the adverse effects of socioeconomic and cultural factors on public health, strategies targeting current smoking and obesity among Asian migrants of specific nationalities in Korea are needed to address the primary and secondary prevention of NCDs.<sup>39-41</sup>

In 2015, among participants aged  $\geq 20$  years, the age-adjusted prevalence of obesity was higher in Chinese, Filipino, and other Asian migrant women than in Korean women. In addition, in our previous study, analyzing the characteristics of migrants, women underwent health check-ups less frequently than men, but the number of women increased with each year from 2009 to 2015.<sup>16</sup> In migrants, unhealthy diets, lack of physical activity, low socioeconomic status, genetics, and the interaction of genetics with the environment may lead to obesity, diabetes, and hypertension.<sup>9 42-44</sup> Moreover, obesity is one of the major health problems of migrants, particularly migrant women.<sup>45</sup> However, compared with Koreans, we could not find a clear overall pattern of concurrence between obesity and diabetes/hypertension among Asian migrants. This is consistent with the findings of previous research, showing that there was no concurrence pattern between obesity and T2D among international migrants from the Western Pacific to Europe (including Chinese and Vietnamese migrants).<sup>45</sup> Nonetheless, among participants aged 40–49 years, Chinese migrant women had a higher prevalence of obesity and hypertension than Korean women. Furthermore, there was a clear pattern of concurrence between obesity and hypertension in Chinese migrant women aged 40–49 years. Either socioeconomic or cultural stress and obesity may be the main factors contributing to hypertension.<sup>9 17 46-48</sup> Among Filipino migrant women aged 20–49 years, we found a distinct pattern of concurrence between obesity and diabetes/hypertension, as compared with Korean women, probably because of unhealthy diets, lack of exercise, early life factors, poor adherence to medication, low socioeconomic status, and both genetic

and genetic–environmental interactions.<sup>9 42–44</sup> Therefore, the stress generated by adapting to a new cultural process may contribute to a greater prevalence of hypertension among Filipino migrant women aged 20–49 years, and this appears to be more important than unhealthy diets or lack of exercise.<sup>47 48</sup>

In 2015, among participants aged 30–39 years, Chinese migrant men had a greater prevalence of diabetes than Korean men, whereas Filipino migrant women had a greater prevalence of diabetes than Korean women. Therefore, the migrant age group of 30–39 years might be more susceptible to diabetes after several migrant-related lifestyle changes.<sup>9 42–44</sup> Nonetheless, the majority of Asian migrants were less likely to have T2D and hypertension than Koreans.<sup>16 17</sup> Furthermore, during 2010–2015, among participants aged 20–39 years, Vietnamese migrant men were more likely to have T2D than Korean men. This finding is consistent with previous studies, showing that international migrants developed diabetes 10–20 years earlier than the local population of their host countries.<sup>9 49 50</sup>

Here, Japanese and Vietnamese migrants have a higher prevalence of hypercholesterolemia than Koreans. In addition, among participants aged 20–49 years, Filipino migrant men have a higher prevalence of hypercholesterolemia than Korean men, especially targeting the age groups of 20–29 and 30–39 years. Previous studies shows that, because of Americanized diets, which are higher in fat than traditional Japanese diets, total cholesterol levels in Japanese Americans became higher than that in Japanese natives.<sup>51 52</sup> Although diet and hypercholesterolemia may increase the prevalence of coronary heart disease, the influence of Japanese culture on coronary heart disease is important, irreplaceable, and independent of unhealthy diets and smoking.<sup>51 53 54</sup> Furthermore, given the importance of the cultural influence and possible closer social networks, the majority of Asian migrants in Korea could have been protected from T2D and hypertension by cultural effects. However, Vietnamese migrant men aged 20–39 years could be more susceptible to T2D because of greater vulnerability to the stress from the Korean society and culture, under the combined effect of unhealthy diets, genetic and genetic–environmental interactions.

Considering the important relationship between the pressure of cultural changes and elevated blood pressure among migrants, the reason that most Asian migrants were less likely to develop hypertension

than Koreans might be the similar cultures and the relatively close geographic location to their home country.<sup>17 47 48</sup> Asian migrants might be more likely to adapt to the social environment of Korea and maintain large social networks, ensuring sufficient social support. These factors might help Asian migrants in Korea reduce stress and deal with conflicts more easily than when adapting to a different society. Nevertheless, we cannot exclude the possibility that Asian migrants may return to their home countries either because of poor health or financial difficulties in Korea.<sup>55-57</sup> Therefore, while the detectable overall incidence of diabetes and hypertension were lower in this and previous studies among Asian migrants, the true incidence might be higher.<sup>16, 17</sup> However, in our study, Filipino migrant women had a higher probability of developing hypertension than Korean women. This might be caused by the social and cultural challenges encountered by Filipino women during the process of acculturation to Korea.<sup>11 47 48</sup>

Compared with the general population in their home countries, we found that most Asian migrants in Korea were healthier regarding the prevalence of obesity, diabetes, and elevated blood pressure. Nevertheless, the prevalence of obesity and diabetes among Filipino migrant men was greater, compared to men from the general Philippine population, potentially due to an unhealthy diet, lack of physical activity, low socioeconomic status, genetics, and the interaction between genetics and the environment.<sup>9 42-44</sup> From 2009 to 2015, the age-adjusted prevalence of diabetes, hypertension, and hypercholesterolemia among most Asian migrants—regardless of sex—was lower than that among Koreans.<sup>16</sup> Based on previous studies, the need for better economic status, educational background, and social and living environment among international migration can explain the healthy migrant effect, combined with the self-selection of migrants as well as the host country's immigration policy.<sup>2 11 31 58</sup> Moreover, the international migration process usually includes the cycle of before and after arrival to high-income host countries, and the return to the migrants' home countries.<sup>31</sup> However, regarding Israel, the reason for the prevalence of the sick migrant effect could be attributed to the Jewish population's international migration to Israel for ideological and not for economic motivations, compared with the healthy migrant effect in the 16 European countries.<sup>11</sup> Therefore, the pursuit for better economic, educational, or social and living environmental needs, combined with the self-selection of migrants and

the immigration policy of the Korean government, may explain the healthy migration advantage in some NCD risk factors, especially targeting diabetes and hypertension, among most Asian migrants in Korea.

### **Meaning of the study**

In 2015, among Chinese and Japanese migrants, there was an overall health advantage regarding diabetes and hypertension. However, the age-adjusted prevalence of diabetes and hypertension Filipino migrants—regarding both men and women—was similar to that in Koreans. The age-adjusted prevalence of diabetes in Vietnamese migrant women was similar to that in Korean women, whereas the age-adjusted prevalence of diabetes and hypertension in other Asian migrant women was similar to that in Korean women. Between 2009–2015, based both on this and previous studies, the healthy migration advantages of Filipino, Vietnamese, and other Asian migrants, particularly migrant women, is gradually diminishing, particularly considering the lower socioeconomic situations, cultural stress, and increasing trends of obesity among Asian migrants in Korea.<sup>2 7 8 16 17</sup> In addition, both the problem of current smoking among Chinese migrant men and other Asian migrant women and that of obesity among Chinese, Filipino, and other Asian migrant women in Korea need to be addressed to prevent NCDs, especially targeting cardiovascular disease and lung cancer.<sup>24 39 59</sup>

### **Conclusions and implications for future research**

In conclusion, the identified relationships between Asian migrant nationality and NCD risk factors provide basic evidence for targeting high-risk groups and improving policy development in Korea. Future studies should focus on using large-scale, high-quality longitudinal data, targeting the nationwide population of Korea from the National Health Insurance Service or the National Health and Nutrition Examination Surveys, to persistently monitor both communicable disease and NCD, and respective risk factors for social and health policy-making among migrants in Korea and Asia compared with their home and host country populations. In addition, the perspective of preventative medicine should be taken into account to investigate the healthy migrant effect over time, fully considering

socioeconomic and cultural factors. To distinguish between genetics, environment, and their interaction, more rigorous and innovative study designs should be used to conduct research on the health effects of culture, social environment, and ethnicity/race on the occurrence of NCDs such as dyslipidemia, cardiovascular disease, and cancer.

**Acknowledgements:** We thank Carol Brayne and Caroline Lee (University of Cambridge), Jae-Heon Kang (Sungkyunkwan University), Jian Li (University of California), Jong-Koo Lee and Young-Ho Khang (Seoul National University), and Shu-Zheng Liu (Zhengzhou University) for their constructive suggestions and comments. We also thank Editage ([www.editage.cn](http://www.editage.cn)), Luyao Zhang (Zhengzhou University), and Mohamed S. Bangura (Dalian Medical University), for English language editing.

**Contributors:** HP, JMY, AS, and BC conceived the study. HP wrote the first and successive drafts of the manuscript. HP modeled and analyzed the data. HP, JMY, and AS contributed to study conception and design. JMY, AS, and DK contributed to data analysis. All authors revised the manuscript for important intellectual content. HP and BC had full access to the data and take responsibility for the integrity of the data and the accuracy of the data analysis. HP and BC are the guarantors. The corresponding authors attest that all the listed authors meet the authorship criteria and that no others meeting the criteria have been omitted.

**Competing interests:** All authors have completed the ICMJE uniform disclosure form at [www.icmje.org/coi\\_disclosure.pdf](http://www.icmje.org/coi_disclosure.pdf) and declare that: Belong Cho reports grants and non-financial support from Yuhan Pharmaceutical, during the conduct of the study. Heng Piao reports grants and non-financial support from Yuhan Pharmaceutical, during the conduct of the study. The other authors have no financial relationships with any organizations that might have an interest in the submitted work in the previous 3 years; and that there are no other relationships or activities that could appear to have influenced the submitted work.

**Ethical approval:** The Institutional Review Board of Seoul National University Hospital approved the study on August 21, 2018 (IRB number: E-1808-093-966). Moreover, per IRB's criteria, the need for



obtaining informed participant consent was waived in our study.

**Data sharing:** No additional data available.

**Funding:** This study was funded by the Seoul National University Hospital (Republic of Korea), Yuhan Pharmaceutical (Republic of Korea), and Henan Cancer Hospital/Affiliated Cancer Hospital of Zhengzhou University (China). The funders had no role in study design, data collection and analysis, decision to publish, or preparation of the manuscript.

**Transparency:** The lead author (HP) affirms that this manuscript is an honest, accurate, and transparent account of the study being reported; that no important aspects of the study have been omitted; and that any discrepancies from the study as planned (and, if relevant, registered) have been explained.

## References

1. Aldridge RW, Nellums LB, Bartlett S, et al. Global patterns of mortality in international migrants: a systematic review and meta-analysis. *Lancet* 2018;39:2553-66.
2. Vang ZM, Sigouin J, Flenon A, Gagnon A. Are immigrants healthier than native-born Canadians? A systematic review of the healthy immigrant effect in Canada. *Ethn Health* 2017;22:209-41.
3. Kennedy S, Kidd MP, McDonald JT, Biddle N. The healthy immigrant effect: Patterns and evidence from four countries. *J Int Migr Integr* 2015;16:317-32.
4. McDonald JT, Kennedy S. Insights into the 'healthy immigrant effect': health status and health service use of immigrants to Canada. *Soc Sci Med* 2004;59:1613-27.
5. Chiswick BR, Lee YL, Miller PW. Immigrant selection systems and immigration health. *Contemp Econ Pol* 2008;26:555-78.
6. Marmot MG, Adelstein AM, Bulusu L. Lessons from the study of immigrant mortality. *Lancet* 1984;1:1455-7.
7. Argeanu Cunningham S, Ruben JD, Narayan KM. Health of foreign-born people in the United States: a review. *Health Place* 2008;14:623-35.
8. Rechel B, Mladovsky P, Ingleby D, Mackenbach JP, McKee M. Migration and health in an increasingly diverse Europe. *Lancet* 2013;381:1235-45.
9. Agyemang C, van den Born BJ. Non-communicable diseases in migrants: An expert review. *J Travel Med* 2018;26:tay107.
10. Commodore-Mensah Y, Ukonu N, Obisesan O, et al. Length of residence in the United States is associated with a higher prevalence of cardiometabolic risk factors in immigrants: a contemporary analysis of the National Health Interview Survey. *J Am Heart Assoc* 2016;5:e004059.
11. Constant AF, García-Muñoz T, Neuman S, Neuman T. A "healthy immigrant effect" or a "sick immigrant effect"? Selection and policies matter. *Eur J Health Econ* 2018;19:103-21.
12. Zheng W, McLerran DF, Rolland B, et al. Association between body-mass index and risk of

- death in more than 1 million Asians. *N Engl J Med* 2011;364:719-29.
13. Sattar N, Gill JM. Type 2 diabetes in migrant south Asians: mechanisms, mitigation, and management. *Lancet Diabetes Endocrinol* 2015;3:1004-16.
  14. Misra A, Tandon N, Ebrahim S, et al. Diabetes, cardiovascular disease, and chronic kidney disease in South Asia: current status and future directions. *BMJ* 2017;357:j1420.
  15. Jee SH, Sull JW, Park J, et al. Body-mass index and mortality in Korean men and women. *N Engl J Med* 2006;355:779-87.
  16. Piao H, Yun JM, Shin A, Cho B. Longitudinal study of diabetic differences between international migrants and natives among the Asian population. *Biomol Ther (Seoul)* 2020;28:110-18.
  17. Piao H. A comparison of cardiovascular risk factors among Asian migrants and the native population in Korea. The Graduate School of Seoul National University, 2020. Accessed at <http://dcollection.snu.ac.kr/common/orgView/000000163370>
  18. Vearey J, Orcutt M, Gostin L, Braham CA, Duigan P. Building alliances for the global governance of migration and health. *BMJ* 2019;366:l4143.
  19. Cheol Seong S, Kim Y-Y, Khang Y-H, et al. Data resource profile: the national health information database of the National Health Insurance Service in South Korea. *Int J Epidemiol* 2016;46:799-800.
  20. Song SO, Jung CH, Song YD, et al. Background and data configuration process of a nationwide population-based study using the Korean national health insurance system. *Diabetes Metab J* 2014;38:395-403.
  21. Lee YH, Han K, Ko SH, Ko KS, Lee KU; Taskforce Team of Diabetes Fact Sheet of the Korean Diabetes Association. Data analytic process of a nationwide population-based study using national health information database established by National Health Insurance Service. *Diabetes Metab J* 2016;40:79-82.
  22. Lee H, Cho J, Shin DW, et al. Association of cardiovascular health screening with mortality, clinical outcomes, and health care cost: a nationwide cohort study. *Prev Med* 2015;70:19-25.

23. Lee J, Lee JS, Park S-H, Shin SA, Kim K. Cohort profile: the national health insurance service–national sample cohort (NHIS-NSC), South Korea. *Int J Epidemiol* 2017;46:e15-e15.
24. Di Cesare M, Khang YH, Asaria P, et al. Inequalities in non-communicable diseases and effective responses. *Lancet* 2013;381:585-97.
25. Kinra S, Bowen LJ, Lyngdoh T, et al. Sociodemographic patterning of non-communicable disease risk factors in rural India: a cross sectional study. *BMJ* 2010;341:c4974.
26. Ezzati M, Lopez AD, Rodgers A, Vander Hoorn S, Murray CJL; Comparative Risk Assessment Collaborating Group. Selected major risk factors and global and regional burden of disease. *Lancet* 2002;360:1347-60.
27. Grundy SM, Cleeman JI, Daniels SR, et al. Diagnosis and management of the metabolic syndrome: an American Heart Association/National Heart, Lung, and Blood Institute scientific statement. *Circulation* 2005;112:2735-52.
28. O'Donnell CJ, Elosua R. Cardiovascular risk factors. Insights from Framingham Heart Study. *Rev Esp Cardiol* 2008;61:299-310.
29. Ahmad OB, Boschi-Pinto C, Lopez AD, Murray CJL, Lozano R, Inoue M. Age standardization of rates: a new WHO standard. World Health Organization, 2001.
30. Barros AJ, Hirakata VN. Alternatives for logistic regression in cross-sectional studies: an empirical comparison of models that directly estimate the prevalence ratio. *BMC Med Res Methodol* 2003;3:21.
31. Abubakar I, Aldridge RW, Devakumar D, et al. The UCL-Lancet Commission on Migration and Health: the health of a world on the move. *Lancet* 2018;392:2606-54.
32. Lee J-W, Kang H-T, Lim H-J, Park B. Trends in diabetes prevalence among Korean adults based on Korean National Health and Nutrition Examination Surveys III–VI. *Diabetes Res Clin Pract* 2018;138:57-65.
33. Ang JW, Chia C, Koh CJ, et al. Healthcare-seeking behaviour, barriers and mental health of non-domestic migrant workers in Singapore. *BMJ Glob Health* 2017;2:e000213.
34. Tziomalos K. Secondary hypertension: Novel insights. *Curr Hypertens Rev* 2020;16:11.

35. Lee H-Y, Shin J, Kim G-H, et al. 2018 Korean Society of Hypertension Guidelines for the management of hypertension: part II-diagnosis and treatment of hypertension. *Clin Hypertens* 2019;25:20.
36. Omura M, Saito J, Yamaguchi K, Kakuta Y, Nishikawa T. Prospective study on the prevalence of secondary hypertension among hypertensive patients visiting a general outpatient clinic in Japan. *Hypertens Res* 2004;27:193-202.
37. Bosdriesz JR, Lichthart N, Witvliet MI, Busschers WB, Stronks K, Kunst AE. Smoking prevalence among migrants in the US compared to the US-born and the population in countries of origin. *PLoS One* 2013;8:e58654.
38. Weber MF, Banks E, Sitas F. Smoking in migrants in New South Wales, Australia: report on data from over 100 000 participants in The 45 and Up Study. *Drug Alcohol Rev* 2011;30:597-605.
39. Blakely T, Fawcett J, Hunt D, Wilson N. What is the contribution of smoking and socioeconomic position to ethnic inequalities in mortality in New Zealand? *Lancet* 2006;368:44-52.
40. Singh GK, Jemal A. Socioeconomic and racial/ethnic disparities in cancer mortality, incidence, and survival in the United States, 1950-2014: Over ix secades of changing patterns and widening inequalities. *J Environ Public Health* 2017;2017:2819372.
41. Koene RJ, Prizment AE, Blaes A, Konety SH. Shared risk factors in cardiovascular disease and cancer. *Circulation* 2016;133:1104-14.
42. Agyemang C, van Oeffelen AA, Norredam M, et al. Socioeconomic inequalities in stroke incidence among migrant groups: analysis of nationwide data. *Stroke* 2014;45:2397-403.
43. Agyemang C, Beune E, Meeks K, et al. Rationale and cross-sectional study design of the Research on Obesity and type 2 Diabetes among African Migrants: the RODAM study. *BMJ Open* 2014;4:e004877.
44. Misra A, Ganda OP. Migration and its impact on adiposity and type 2 diabetes. *Nutrition* 2007;23:696-708.

45. Meeks KA, Freitas-Da-Silva D, Adeyemo A, et al. Disparities in type 2 diabetes prevalence among ethnic minority groups resident in Europe: a systematic review and meta-analysis. *Intern Emerg Med* 2016;11:327-40.
46. Commodore-Mensah Y, Samuel LJ, Dennison-Himmelfarb CR, Agyemang C. Hypertension and overweight/obesity in Ghanaians and Nigerians living in West Africa and industrialized countries: a systematic review. *J Hypertens* 2014;32:464-72.
47. Gibson J, Stillman S, McKenzie D, Rohorua H. Natural experiment evidence on the effect of migration on blood pressure and hypertension. *Health Econ* 2013;22:655-72.
48. Steffen PR, Smith TB, Larson M, Butler L. Acculturation to Western society as a risk factor for high blood pressure: a meta-analytic review. *Psychosom Med* 2006;68:386-97.
49. Snijder MB, Agyemang C, Peters RJ, Stronks K, Ujcic-Voortman JK, van Valkengoed IGM. Case finding and medical treatment of type 2 diabetes among different ethnic minority groups: The HELIUS Study. *J Diabetes Res* 2017;2017:9896849.
50. Mather HM, Chaturvedi N, Fuller JH. Mortality and morbidity from diabetes in South Asians and Europeans: 11-year follow-up of the Southall Diabetes Survey, London, UK. *Diabet Med* 1998;15:53-9.
51. Marmot MG, Syme SL, Kagan A, Kato H, Cohen JB, Belsky J. Epidemiologic studies of coronary heart disease and stroke in Japanese men living in Japan, Hawaii and California: prevalence of coronary and hypertensive heart disease and associated risk factors. *Am J Epidemiol* 1975;102:514-25.
52. Yano K, Rhoads GG, Kagan A, Tillotson J. Dietary intake and the risk of coronary heart disease in Japanese men living in Hawaii. *Am J Clin Nutr* 1978;31:1270-9.
53. Marmot MG, Syme SL. Acculturation and coronary heart disease in Japanese-Americans. *Am J Epidemiol* 1976;104:225-47.
54. Matsumoto YS. Social stress and coronary heart disease in Japan: A hypothesis. *Milbank Mem Fund Q* 1970;48:9-36.
55. Palloni A, Arias E. Paradox lost: explaining the Hispanic adult mortality advantage.

*Demography* 2004;41:385-415.

56. Abraído-Lanza AF, Dohrenwend BP, Ng-Mak DS, Turner JB. The Latino mortality paradox: a test of the "salmon bias" and healthy migrant hypotheses. *Am J Public Health* 1999;89:1543-8.
57. Pablos-Méndez A. Mortality among Hispanics. *JAMA* 1994;271:1237.
58. Kennedy S, McDonald JT, Biddle N. The Healthy Immigrant Effect and Immigrant Selection: Evidence from Four Countries. *Social and Economic Dimensions of an Aging Population Research Papers* 2006:164.
59. Vineis P, Wild CP. Global cancer patterns: causes and prevention. *Lancet* 2014;383:549-57.

## Figure Legends

**Figure 1.** Comparison of the age-adjusted prevalence ratios of diabetes and hypertension between Asian migrants of different nationalities and Koreans aged 20–49 years who underwent health check-ups in 2015\*

**Figure 2.** Multivariable adjusted odds ratios of developing type 2 diabetes between the first and last health check-ups, according to nationality during 2009-2015\*

**Figure 3.** Multivariable adjusted odds ratios of developing hypertension between the first and last health check-ups, according to nationality during 2009-2015\*

**Figure 4.** Age-adjusted prevalence of obesity, elevated blood pressure, and diabetes among Chinese, Filipino, and Vietnamese migrants, compared with the general population in their home countries\*



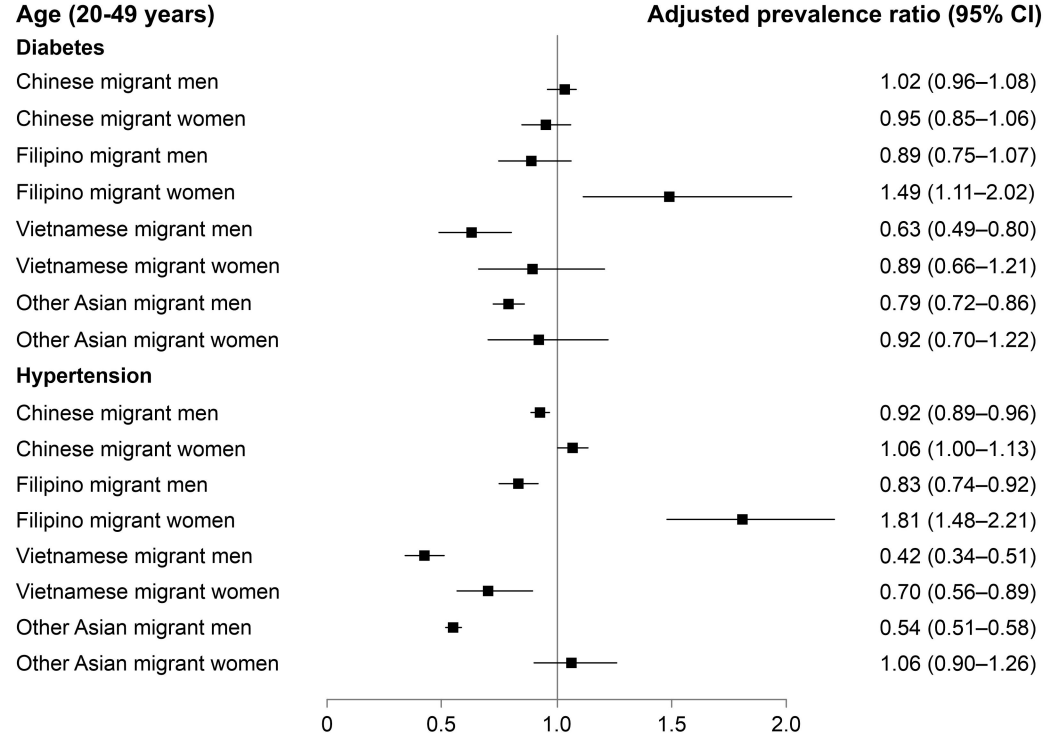

\* Age-adjusted prevalence ratios and 95% confidence intervals (CIs) of diabetes and hypertension were examined; age standardization with 10-year age bands; the world standard population was used as the standard population.

## Type 2 diabetes

## Adjusted odds Ratio (95% CI)

### Age (20-39 years)

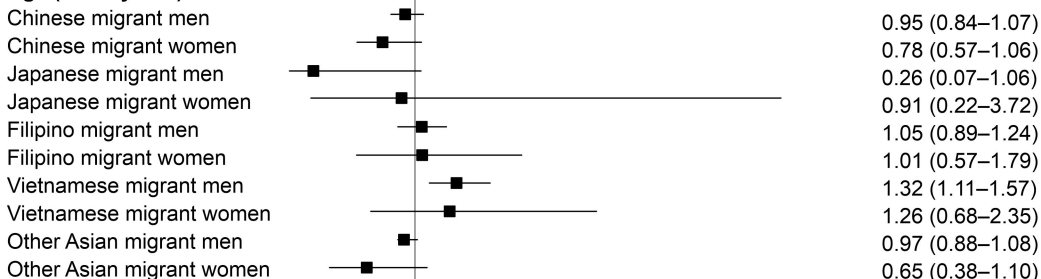

### Age (≥40 years)

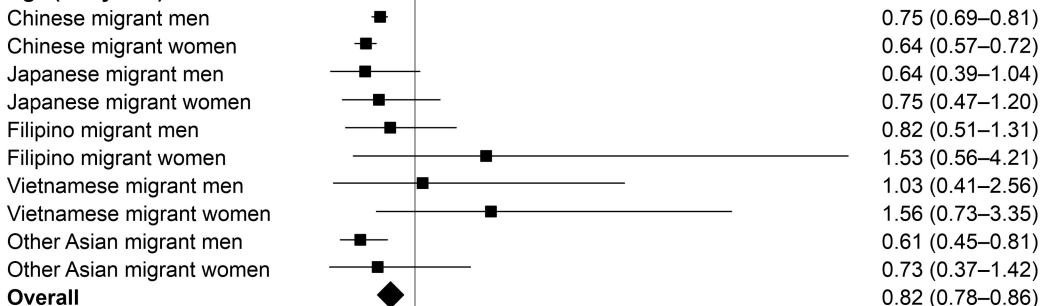

\* Adjusted odds ratios and 95% confidence intervals (CIs) of incident type 2 diabetes determinants were determined using the multivariable logistic regression model; adjusted for age (continuous, years), economic status, BMI (continuous, kg/m<sup>2</sup>), smoking status, any alcohol use, and physical activity.

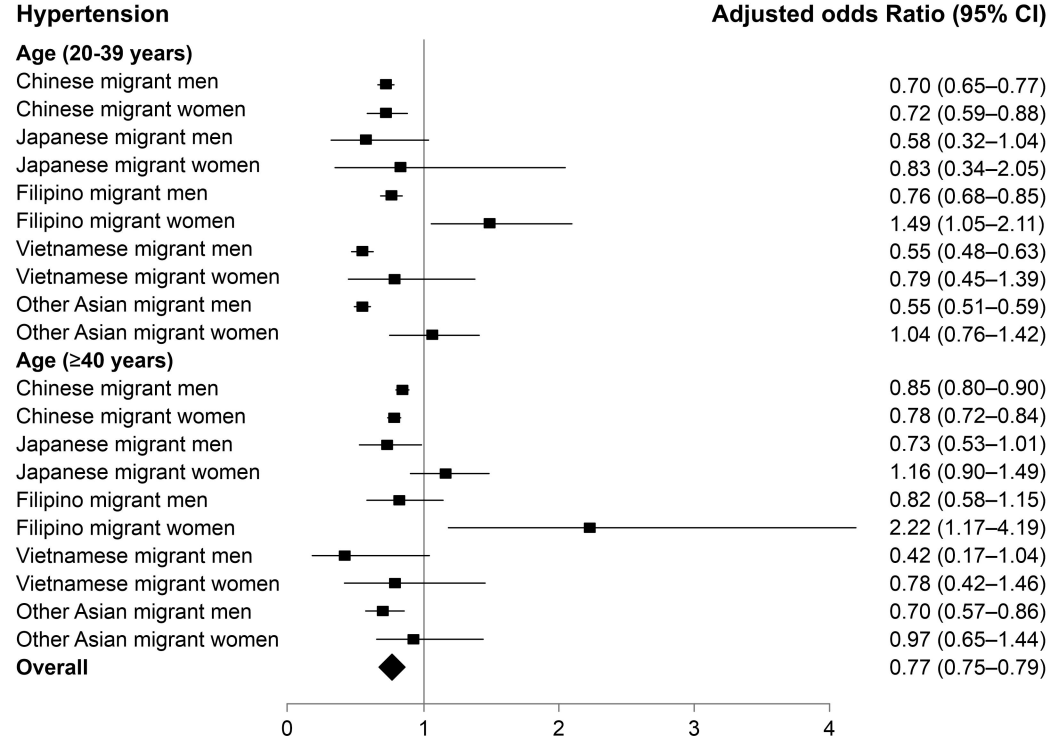

\* Adjusted odds ratios and 95% confidence intervals (CIs) of incident hypertension determinants were determined using the multivariable logistic regression model; adjusted for age (continuous, years), economic status, BMI (continuous, kg/m<sup>2</sup>), smoking status, any alcohol use, and physical activity.

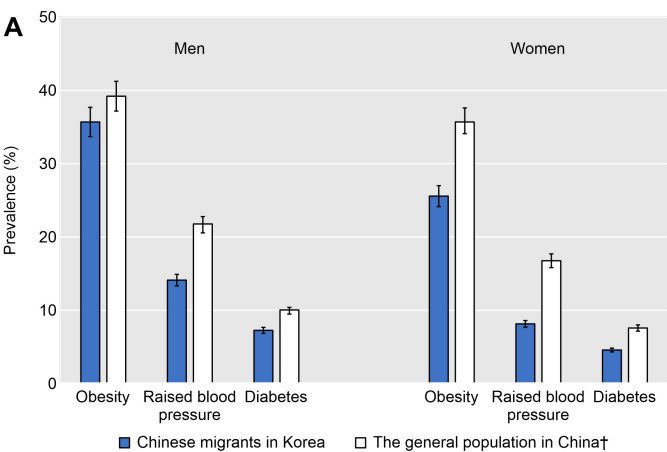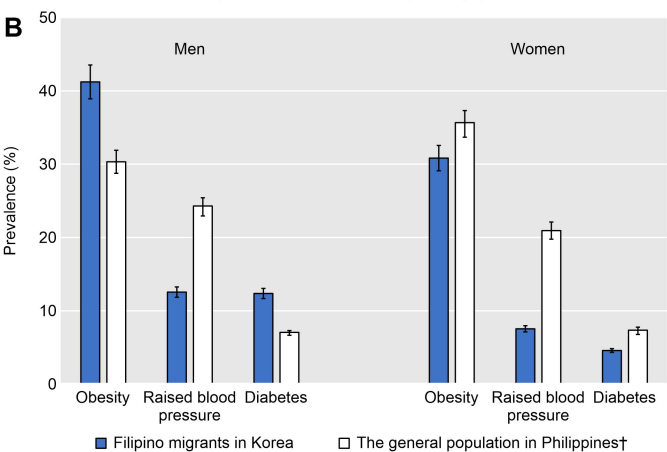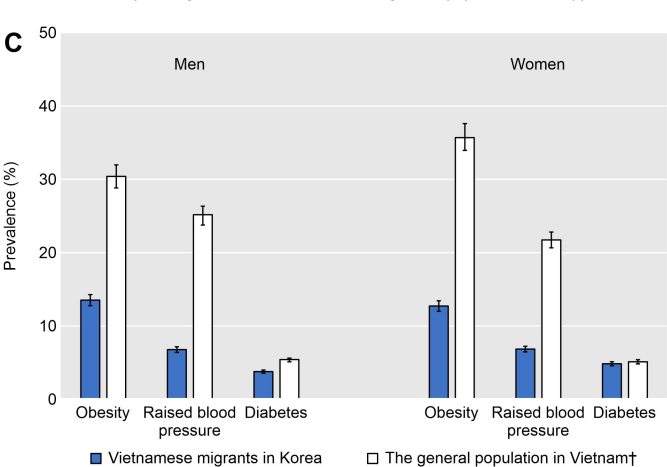

\* Data are expressed as %; age standardization with 10-year age bands; the world standard population was used as the standard population; obesity was defined as a BMI  $\geq 25$  kg/m<sup>2</sup> for the Asian population; elevated blood pressure was defined as blood pressure  $\geq 140/90$  mm Hg; diabetes was defined as a fasting blood glucose  $\geq 126$  mg/dL, previous diabetes diagnosis, or prescription of antidiabetic drugs; regarding obesity and elevated blood pressure, we used the data in 2015; regarding diabetes, we used the data in 2014.

† Source: data from the global health observatory data repository of World Health Organization. Available from: <http://apps.who.int/gho/data/node.main.A867?lang=en/>.

**Hypothesis:** Asian migrants of different nationalities have a greater health advantage in terms of non-communicable disease risk factors than Koreans do.

**Data:** The National Health Information Database established by the Korean National Health Insurance Service

**Subject:** Adults aged 20 years and older (987,214 Asian migrants and 1,693,281 Koreans) who received health check-ups (2009–2015)

**Asian migrants:** Chinese, Japanese, Filipino, Vietnamese and other Asian migrants

**Objective 1:** The prevalence of non-communicable disease risk factors in Asian migrants of different nationalities versus Koreans in 2015

**Direct age standardization** with 10-year age bands; the world standard population (the standard population)

**Age-specific prevalence** among participants aged 20–29, 30–39, and 40–49 years

**Objective 2:** The incidence of type 2 diabetes and hypertension in Asian migrants of different nationalities versus Koreans (2010–2015)

**Multivariable logistic regression analyses** stratified by age (20–39 and ≥40 years) and sex, after adjustment for covariates

Each participant who developed type 2 diabetes and hypertension between the first and last health check-ups was considered a new incident case.

**Objective 3:** The age-adjusted prevalence of obesity, elevated blood pressure, and diabetes in Asian migrants of different nationalities versus the general population of their home countries

**Direct age standardization** with 10-year age bands; the world standard population (the standard population)
